# 1 **Ion transport mechanisms for smoke inhalation injured airway epithelial barrier**

2 **Jianjun Chang<sup>1,2</sup>, Zaixing Chen<sup>1&</sup>, Runzhen Zhao<sup>1</sup>, Hong-Guang Nie<sup>3,\*</sup>, Hong-Long Ji<sup>1,4\*</sup>**

3 <sup>1</sup>Department of Cellular and Molecular Biology, University of Texas Health Science Center at Tyler, 11937 US Hwy 271, Tyler Texas  
4 75708, USA; <sup>2</sup>Institute of Health Sciences, China Medical University, Shenyang 110122, Liaoning, China; <sup>3</sup>Department of Stem Cells  
5 and Regenerative Medicine, College of Basic Medical Science, China Medical University, Shenyang 110122, Liaoning, China; <sup>4</sup>Texas  
6 Lung Injury Institute, University of Texas Health Science Center at Tyler, Tyler Texas 75708, USA

7 e-mail: jianjun\_chang@yeah.net, zaixingchen@sina.com, runzhen.zhao@uthct.edu, hgnie@cmu.edu.cn, james.ji@uthct.edu

8  
9  
0 <sup>&</sup>Present address: School of Pharmacy, China Medical University, Shenyang 110122, Liaoning, China

1  
2 \*Corresponding author.

3  
4 Acknowledgments: This work was supported by the grants from the National Institute of Health (NIH HL134828), and the National  
5 Natural Science Foundation of China (NSFC 81670010).

6  
7 Word count: Title 10, Abstract 253, Main text word count 6801

8

**Abstract** Smoke inhalation injury is the leading cause of death in firefighters and victims. Inhaled hot air and toxic smoke are the predominant hazards to the respiratory epithelium. We aimed to analyze the effects of thermal stress and smoke aldehyde on the permeability of the airway epithelial barrier. Transepithelial resistance ( $R_{TE}$ ) and the short-circuit currents ( $I_{SC}$ ) of primary mouse tracheal epithelial (MTE) monolayers were digitized by an Ussing chamber setup. Zonula occludens (ZO)-1 tight junction protein was visualized under confocal microscopy. A cell viability test and fluorescein isothiocyanate-dextran assay were performed. Thermal stress (40°C) decreased  $R_{TE}$  in a two-phase manner. Meanwhile, thermal stress increased  $I_{SC}$  followed by its decline.  $Na^+$  depletion, amiloride (inhibitor for epithelial  $Na^+$  channels [ENaCs]), ouabain (blocker for  $Na^+/K^+$ -ATPase) and CFTRinh-172 (blocker of cystic fibrosis transmembrane regulator [CFTR]) altered the responses of  $R_{TE}$  and  $I_{SC}$  to thermal stress. Steady state 40°C increased activity of ENaCs,  $Na^+/K^+$ -ATPase, and CFTR. Acrolein, which is one of the main oxidative unsaturated aldehydes in fire smoke, eliminated  $R_{TE}$  and  $I_{SC}$ .  $Na^+$  depletion, amiloride, ouabain, and CFTRinh-172 suppressed acrolein-sensitive  $I_{SC}$ , but showed activating effects on acrolein-sensitive  $R_{TE}$ . Thermal stress or acrolein disrupted ZO-1 tight junctions, increased fluorescein isothiocyanate-dextran permeability but failed to cause cell death and detachment in MTE monolayers. The synergistic effect of thermal stress and acrolein exacerbated the damage to MTE monolayers. In conclusion, the paracellular pathway mediated by the tight junctions and the transcellular pathway mediated by ion channels and transporters contribute to impairing the airway epithelial barrier caused by thermal stress and acrolein.

**Keywords:** thermal stress; acrolein; primary trachea epithelial cells; ion transport; tight junctions

## 1 **Introduction**

2 Fire is a common disaster in urban and rural populations. Smoke is a complicated mixture of hot air, toxic chemicals, and suspended  
3 particles (Fitzgerald and Flood 2006). Inhalation of harmful smoke causes direct impairment of respiratory function and is the leading  
4 cause of fire-related death (Haponik 1993). Inhaled hot air and toxic chemicals in smoke from fire impair the respiratory tract and lungs.

5 The airway epithelial barrier is the most important mechanical defense barrier in the respiratory tract (Wang et al. 2008).  
6 Approximately 80% of the cells are ciliated in the normal respiratory tract, about. These cells form a tight airway epithelial layer, which  
7 can effectively prevent various external attacks (Hou et al. 2019). Destruction of the integrity of the airway epithelial barrier can be an  
8 important indicator of occurrence and the development of many respiratory diseases (Wang et al. 2007). Under pathological conditions,  
9 the integrity of the airway epithelial barrier is disrupted and its permeability is increased. Permeability of a tight airway epithelium is  
0 determined by paracellular and transcellular pathways. Paracellular permeability comprises of tight junctions and lateral intercellular  
1 space. Transcellular permeability is predominantly controlled by substantial ion channels and transporters. Apical epithelial  $\text{Na}^+$  channels  
2 (ENaCs) and cystic fibrosis transmembrane regulator (CFTR), as well as basolateral  $\text{Na}^+/\text{K}^+$ -ATPase, are mainly responsible for  $\text{Na}^+/\text{Cl}^-$   
3 transport in the respiratory epithelium (Chang et al. 2018; Wang et al. 2007). In respiratory epithelium, passive ion transport mediated  
4 by ENaCs is an important determinant of transcellular permeability, and active  $\text{Na}^+/\text{K}^+$ -ATPase provides the driving force for passive  
5 ion transport systems.

6 A previous study showed the mats of ciliated cells in rat tracheal epithelium post-thermal injury (Dubick et al. 2002). Thermal  
7 stress-regulated ENaCs in alveolar epithelial cells (Howard et al. 2013) and CFTR are implicated in thermal stress-induced signaling  
8 events in bronchial epithelial cells (Dong et al. 2015). Additionally,  $\text{Na}^+/\text{K}^+$ -ATPase is heat-sensitive in rabbit esophageal epithelium  
9 (Tobey et al. 1999). However, whether thermal stress regulates permeability of the airway epithelial barrier through the paracellular  
0 pathway (mediated by tight junctions) and the transcellular pathway (mediated by ion channels and transporters, i.e., ENaCs) in  
1 primary airway epithelial cells remains unclear.

2 Smoke aldehydes are released from the burning of wood and paper products, as well as cotton fabrics. Formaldehyde and acrolein

are the two main gaseous  $\alpha$ ,  $\beta$  unsaturated aldehydes in fire and cigarette smoke (Reinhardt and Ottmar 2004; Anthony et al. 2007; Alwis et al. 2015). Inhalation of formaldehyde and acrolein results in gene induction, inflammation, cell apoptosis, and necrosis in the respiratory epithelium (Bein and Leikauf 2011; Meacher and Menzel 1999). Our previous studies showed that formaldehyde and crotonaldehyde inhibited the activity and expression of ENaCs in alveolar epithelial cells (Cui et al. 2016; Li et al. 2017). Acrolein lead to irritation of the airway and impaired fluid homeostasis (Borchers et al. 1998; Romet-Haddad et al. 1992; Roux et al. 2002), as well as down-regulated CFTR activity in respiratory epithelial cells (Alexander et al. 2012). Acrolein is used to prepare animal models for acute lung injury and lung edema (Hales et al. 1988). However, the pathological role of acrolein in the presence of thermal stress in the smoke-injured airway epithelial barrier has not been studied.

Therefore, this study aimed to investigate the effects of thermal stress or/and acrolein on permeability of the airway epithelial barrier. We recorded the transepithelial resistance ( $R_{TE}$ ) and short-circuit current ( $I_{SC}$ ) in primary mouse tracheal epithelial (MTE) monolayers in an Ussing chamber setup. To further determine the underlying transcellular mechanisms, inhibitors for ion channels and transporters (i.e., amiloride, ouabain and CFTRinh-172) were applied to MTE monolayers. To examine the role of paracellular pathway, the structure of tight junction was visualized under confocal microscopy, and fluorescein isothiocyanate (FITC)-dextran assay was performed.

## Materials and methods

### Animals

Forty healthy wild-type C57BL/6 mice (males, 20; females, 20), 8-12 weeks old (mean:  $10.86 \pm 0.28$  weeks) and weighed 18-25 g (mean:  $20.03 \pm 0.30$  g), were purchased from the Jackson Laboratory and the Laboratory Animal Center of China Medical University. Mice were housed in a pathogen-free facility, the husbandry condition of which included a suitable light/dark cycle, temperature, drinking water, and food. All experiments were performed according to the guidelines and regulations of the Animal Care and Use Ethics Committee, and all protocols were approved by the University of Texas Health Science Center at Tyler and China Medical University.

5 The reference numbers of ethics approval are IACUC 611 and SCXK (Liao) 2018-0001.

6 Isolation and culture of MTE cells

7 Pooled MTE cells were isolated from C57BL/6 mice and cultured according to our previous study (Chen et al. 2014). Briefly, tracheas  
8 of anesthetized mice were removed, and cleaned tracheas were incubated in dulbecco's modified eagle medium (cat# 30-2002, American  
9 Type Culture Collection, USA) containing 0.1% protease XIV (cat# P5147, Sigma, USA), 0.01% DNase (cat #DN25, Sigma-Aldrich,  
0 St. Louis, MO), and 1% fetal bovine serum (cat# 26140-087, Gibco, USA) at 4°C for 24 h. MTE cells were seeded onto 6.5-mm diameter,  
1 collagen IV (cat# 3410-010-01, Trevigen, Gaithersburg, MD)-coated transwell inserts (cat# 3413, Corning-Costar, Lowell, MA) at a  
2 density of  $3.0 \times 10^5/\text{cm}^2$ . These cells were grown in a 1:1 mixture of Ham's F-12 medium (cat# 11765-054, Invitrogen, Camarillo, CA)  
3 and 3T3 fibroblast preconditioned dulbecco's modified eagle medium supplemented with insulin (10  $\mu\text{g}/\text{ml}$ , cat# I1882, Sigma-Aldrich,  
4 St. Louis, MO), hydrocortisone (1  $\mu\text{M}$ , cat# H0396, Sigma-Aldrich, St. Louis, MO), endothelial cell growth supplement (3.75  $\mu\text{g}/\text{ml}$ ,  
5 cat# E0760, Sigma-Aldrich, St. Louis, MO), epidermal growth factor (25  $\text{ng}/\text{ml}$ , cat# E4127, Sigma-Aldrich, St. Louis, MO),  
6 triiodothyronine (30 nM, cat# T6397, Sigma-Aldrich, St. Louis, MO), iron-saturated transferrin (5  $\mu\text{g}/\text{ml}$ , cat# T1283, Sigma-Aldrich,  
7 St. Louis, MO), cholera toxin (10  $\text{ng}/\text{ml}$ , cat# C8052, Sigma-Aldrich, St. Louis, MO), and dexamethasone (250 nM, cat# D2915, Sigma-  
8 Aldrich, St. Louis, MO). MTE cells from one mouse were seeded onto three to four transwell inserts and cultured for up to 12 days.  
9 Polarized monolayers with a reading of  $R_{\text{TE}} > 1000 \Omega$  by an epithelial voltohmmeter (WPI, Sarasota, FL) were used. Monolayers from  
0 the same batch of mice were randomly allocated to control and treated groups.

1 Preparation of human bronchial epithelial monolayers

2 Human bronchial epithelial (HBE) cells were purchased from American Type Culture Collection. Cells were seeded in plastic T-75  
3 flasks and grown in keratinocyte culture medium (cat# 2101, Sciencell, China) supplemented with keratinocyte growth factor (1%). The  
4 culture medium was changed every 48 h until 90% confluent. HBE cells were seeded ( $10^6 \text{ cells}/\text{cm}^2$ ) onto collagen IV-coated transwell  
5 inserts and grown in keratinocyte culture medium supplemented with keratinocyte growth factor (1%), insulin-transferrin-selenium

solution, (1.5%, cat# 41400045, Gibco, USA) and dexamethasone (1  $\mu$ M, cat# D2915, Sigma-Aldrich, St. Louis, MO). Polarized monolayers at 12-day post-seeding were used. At all stages of culture, cells were maintained at 37°C in 5% CO<sub>2</sub> in an air incubator.

#### Preparation and administration of ion transport regulators

Amiloride (cat# A4562, Sigma-Aldrich, St. Louis, MO) was reconstituted in an apical bath solution containing 50% dimethyl sulfoxide (DMSO). CFTRinh-172 (cat# C2992, Sigma-Aldrich, St. Louis, MO) was reconstituted in DMSO. Ouabain (cat# O3125, Sigma-Aldrich, St. Louis, MO) was reconstituted in a basolateral bath solution. Reconstituted amiloride (100  $\mu$ M) or CFTRinh-172 (20  $\mu$ M) was added to the apical bath solution of MTE monolayers. Reconstituted ouabain (1 mM) was added to the basolateral bath solution. Vehicle solution of an equal volume (apical bath solution containing 50% DMSO, DMSO, or basolateral bath solution) was added to the corresponding bath solution as the control.

#### Concurrent measurements of I<sub>SC</sub> and R<sub>TE</sub>

Measurement of I<sub>SC</sub> and R<sub>TE</sub> of MTE or HBE monolayers was performed as we described previously (Han et al. 2010; Nie et al. 2009; Li et al. 2017). In brief, monolayers were mounted into Ussing chambers (Physiologic Instruments, San Diego, CA) and bathed in saline bath solution containing (in mM) 120 NaCl, 25 NaHCO<sub>3</sub>, 3.3 KH<sub>2</sub>PO<sub>4</sub>, 0.83 K<sub>2</sub>HPO<sub>4</sub>, 1.2 CaCl<sub>2</sub>, 1.2 MgCl<sub>2</sub>, 10 HEPES, 10 D-mannitol (apical), and 10 D-glucose (basolateral). The saline bath solution was bubbled continuously with a gas mixture of 95% O<sub>2</sub> and 5% CO<sub>2</sub>. Transepithelial potential was short-circuited to 0 mV, and R<sub>TE</sub> and I<sub>SC</sub> levels were measured with an epithelial voltage clamp (VCC-MC8, Physiologic Instruments, San Diego, CA). A 10-mV pulse of 1 s duration was imposed every 10 s to monitor R<sub>TE</sub> levels. When R<sub>TE</sub> and I<sub>SC</sub> levels were stable for at least 10 min, monolayers were treated as follows: 1) amiloride (100  $\mu$ M) was added to the apical bath solution; 2) CFTRinh-172 (20  $\mu$ M) was added to the apical bath solution; 3) ouabain (1 mM) was applied to the basolateral bath solution; and 4) saline bath solution of both apical and basolateral chambers was replaced with Na<sup>+</sup>-free bath solution or Cl<sup>-</sup>-free bath solution. The same volume of vehicle solution was added to corresponding chambers, which was used as the control of amiloride, CFTRinh-172, or ouabain. The composition of the Na<sup>+</sup>-free bath solution contained (in mM) 120 N-methyl-D-glucamine-Cl, 25 KHCO<sub>3</sub>, 3.3 KH<sub>2</sub>PO<sub>4</sub>, 0.83 K<sub>2</sub>HPO<sub>4</sub>, 1.2 CaCl<sub>2</sub>, 1.2 MgCl<sub>2</sub>, 10 HEPES, 10 D-mannitol (apical), and 10 D-glucose (basolateral). The Cl<sup>-</sup>-free bath

solution contained (in mM) 120 sodium gluconate, 25 NaHCO<sub>3</sub>, 3.3 KH<sub>2</sub>PO<sub>4</sub>, 0.83 K<sub>2</sub>HPO<sub>4</sub>, 1.2 Ca(NO<sub>3</sub>)<sub>2</sub>, 1.2 MgSO<sub>4</sub>, 10 HEPES, 10 D-mannitol (apical), and 10 D-glucose (basolateral). Before replacement of Na<sup>+</sup>-free or Cl<sup>-</sup>-free bath solution, recording of R<sub>TE</sub> and I<sub>SC</sub> levels in the Ussing chamber system was stopped, and then saline bath solution was aspirated from the apical and basolateral chambers. Warm saline (as the control), Na<sup>+</sup>-free bath solution, or Cl<sup>-</sup>-free bath solution was then added to the chambers. Finally, recording in the Ussing chamber system was restored.

### Application of thermal stress or acrolein to monolayers

All experiments of thermal stress or acrolein application were simultaneously performed with recording in the Ussing chamber system. In the experiments for studying the effects of thermal stress on R<sub>TE</sub> and I<sub>SC</sub>, as well as the underlying mechanisms, monolayers were mounted into the chambers in which the temperature was 37°C. The temperature of bath solution of the apical and basolateral chambers was gradually elevated to the designed degree (40°C) from 37°C. A bath circulator (Thermo Fisher Scientific, CA) was used to regulate the temperature of the chambers. The bath circulator was set to the desired temperature. Water was pumped from the bath of the circulator and continuously recirculated around the chambers, thereby transferring heat to the bath solution in the chambers. Additionally, thermometers in the apical and basolateral bath solutions of the chambers were used to monitor and confirm the temperature setting. In the experiments for investigating the effects of thermal stress on ion channels and transporters, the bath solution in the chambers was first set to the desired temperature (40°C), and then monolayers were mounted into chambers to achieve instant exposure of thermal stress. In the experiments of acrolein exposure, a range of working concentrations from 5 to 500 μM was accumulatively pipetted into the apical bath solution. Acrolein vapor was minimized without gas bubbling of the bath solution, and the bath solution was moderately blown up to 10 times to ensure even distribution of acrolein. To study the synergistic effects of acrolein and thermal stress, monolayers were mounted into chambers in which the temperature was already 40°C or 37°C (as the control). When R<sub>TE</sub> and I<sub>SC</sub> traces were stable, a series of concentrations of acrolein were added to the apical bath solution.

### Immunofluorescent staining and imaging of MTE monolayers

MTE monolayers that were *bathed in* saline bath solution in Ussing chambers were exposed to 40°C (120 min) or acrolein (500 μM).

For synergistic treatment of thermal stress and acrolein, MTE monolayers were *bathed in* saline solution (40°C or 37°C), and then 500 µM acrolein was added to the apical bath solution. After this treatment, monolayers were prepared for staining. Monolayers were fixed in phosphate-buffered saline containing 4% paraformaldehyde for 15 min and washed with phosphate-buffered saline. Monolayers were permeabilized with 0.5% Triton X-100 and blocked with a blocking buffer containing 10% goat serum (cat# G9023, Sigma-Aldrich, St. Louis, MO) and 1% bovine serum albumin (cat# A3803, Sigma-Aldrich, St. Louis, MO) for 1 h. Monolayers were incubated with rabbit anti-mouse zonula occludens-1 (ZO-1) antibody (1:50; cat# 61-7300, Invitrogen, Camarillo, CA) or rabbit anti-mouse occludin antibody (1:200; cat# 40-4700, Invitrogen, Camarillo, CA) in blocking buffer overnight at 4°C. Cells were incubated with Alexa Fluor 488-labeled goat anti-rabbit IgG (1:1000, cat# 111-545-045 Jackson Immuno Research Laboratories, Carlsbad, CA) and Hoechst (1:1000, cat# 561908, BD Biosciences, San Jose, CA) and then mounted with Vectashield mounting media (cat# H1000, Vector Laboratories, Burlingame, CA). Images were obtained with a Zeiss LSM 510 confocal microscope (Carl Zeiss AG, Germany). A series of optical sections were collected at 1-µm intervals in the Z-axis. Images and quantification of fluorescence intensity were analyzed with ImageJ (NIH).

#### Cell counting kit-8 assay

Cell viability was quantified by the cell counting kit-8 assay (cat# C0037, Beyotime, Jiangsu, China). Culture medium containing 10% cell counting kit-8 solution was added apically to MTE monolayers at post-treatment of 37°C (control), 40°C (120 min), acrolein (500 µM), or 40°C combined with acrolein. After 2 h of incubation at 37°C, culture medium in transwell inserts was collected. Absorbance was measured at a wavelength of 450 nm.

#### Fluorescein isothiocyanate-dextran assay

To measure dextran permeability, FITC-dextran (4 kDa, 1 mg/ml, cat# FD4, Sigma-Aldrich, St. Louis, MO) was added to the transwell inserts. Aliquots were withdrawn from the lower chambers after 4 h and assayed for fluorescence at 530 nm.

#### Statistical analysis



1 Data are expressed as the mean  $\pm$  SEM. Normality and homoscedasticity tests were performed by the Shapiro-Wilk and Levene tests.  
2 The real power of the sample size with alpha = 0.05 is shown in the figure legends. The student's two-tailed t-test was used for comparing  
3 two groups with parametric data. For comparison of multiple groups, we performed one-way analysis of variance followed by  
4 Bonferroni's test for all groups in the experiments. For non-parametric data, the Mann-Whitney U test was used. Differences were  
5 considered significant when the  $P$  value was  $< 0.05$ . The  $\tau_{1/2}$  value was computed by fitting  $R_{TE}$  raw data with the ExpDec1 function  
6 ( $y = y_0 + Ae^{-x/t}$ ), where  $y$  is  $R_{TE}$ ,  $x$  is time,  $y_0$  is offset; and  $A$  is amplitude. The dose-response curve for acrolein was generated  
7 by fitting the raw data with the Hill equation ( $y = START + (END - START) \frac{x^n}{k^n + x^n}$ ), where  $y$  is the normalized  $R_{TE}/I_{SC}$  value,  $x$  is  
8 the logarithmic concentration of acrolein,  $START$  and  $END$  are initial and ending values of  $R_{TE}$ , respectively,  $k$  is the  $K_i$  value, and  $n$  is  
9 the total number of  $x$ . In thermal-induced  $R_{TE}/I_{SC}$  traces,  $\Delta R_{TE}$  was defined as the difference between the initial  $R_{TE}$  and end of  $R_{TE}$   
0 within one phase (phase 1 [P1] or phase 2 [P2]) or the entire procedure, and  $\Delta I_{SC}$  was defined as the difference between the basal  $I_{SC}$   
1 and the peak  $I_{SC}$  at P1 or the difference between the peak  $I_{SC}$  and ending  $I_{SC}$  at P2. In acrolein-induced  $R_{TE}/I_{SC}$  traces,  $\Delta R_{TE}/\Delta I_{SC}$  was  
2 defined as the difference between basal  $R_{TE}/I_{SC}$  and acrolein-resistant  $R_{TE}/I_{SC}$ . ENaCs, CFTR, or  $Na^+/K^+$ -ATPase activity was determined  
3 as the difference between the basal  $I_{SC}$  and corresponding specific inhibitor-resistant  $I_{SC}$ . Statistical analysis was performed with Origin  
4 Pro 8.0 (OriginLab Corp. MA).

## 6 **Results**

### 7 Thermal stress alters $R_{TE}$ and $I_{SC}$ in MTE and HBE monolayers

8 The airway epithelial barrier is the primary line of defense against external attacks. Under pathogenic conditions, the integrity of this  
9 barrier damaged and permeability is increased. We postulated that thermal stress would regulate permeability of the airway epithelium.  
0 In our study, basal  $R_{TE}$  and  $I_{SC}$  in polarized MTE monolayers were recorded at 37°C. To investigate the effect of thermal stress, the  
1 temperature of the bath solution was elevated from 37°C.  $R_{TE}$  and  $I_{SC}$  were eliminated in minutes when the temperature of the bath  
2 solution was elevated to 44°C or 42°C (Fig. S1). Therefore, 40°C was selected for the temperature of thermal stress.  $R_{TE}$  was decreased

when the temperature of the bath solution was raised to 40°C from 37°C. Moreover, the entire process was divided into two stages of P1) and P2 (Fig. 1a). At each phase,  $R_{TE}$  was significantly decreased in a time-dependent manner (Fig. 1c). We used  $\tau_{1/2}$  to reflect the declining rate of  $R_{TE}$  within one phase, which was computed by fitting  $R_{TE}$  raw data with the ExpDec1 function. The  $\tau_{1/2}$  at P2 was significantly higher than that at P1 (Fig. 1e,  $P < 0.001$ ). We defined P1 and P2 of  $I_{SC}$  using the  $R_{TE}$  time course. In contrast,  $I_{SC}$ , which was recorded in parallel with  $R_{TE}$  was increased at P1 and decreased at P2 (Fig. 1b and 1d, all  $P < 0.01$ ). To overcome the difference between species, we recorded  $R_{TE}$  and  $I_{SC}$  in HBE monolayers during thermal stress. We found that  $R_{TE}$  of HBE monolayers was decreased by thermal stress, which was similar to the result from MTE monolayers (Fig. 1f and 1h,  $P = 0.077$ ). However,  $I_{SC}$  of HBE monolayers was increased to a high and stable level by thermal stress (Fig. 1g and 1i,  $*P < 0.05$ ). Our data suggest that  $R_{TE}$  and  $I_{SC}$  of primary MTE monolayers respond to thermal stress in a phase-dependent, diverse manner.

## Na<sup>+</sup> transport mediates thermal stress-induced bioelectric changes

In respiratory epithelium, Na<sup>+</sup> transport is mainly regulated by ENaCs and Na<sup>+</sup>/K<sup>+</sup>-ATPase (Chang et al. 2018). Passive ion transport across tight epithelial monolayers includes ion channels (i.e., ENaCs) and transporters, which are an important determinant of transcellular permeability. Active Na<sup>+</sup>/K<sup>+</sup>-ATPase provides the driving force for the passive ion transport systems. To examine the role of epithelial Na<sup>+</sup> transport in thermal stress-altered  $R_{TE}$  and  $I_{SC}$ , Na<sup>+</sup>-free bath solution, amiloride, or ouabain was applied to MTE monolayers bathed in Ussing chambers at 37°C followed by elevation to 40°C. The saline bath solution was replaced with a Na<sup>+</sup>-free bath solution to block overall epithelial Na<sup>+</sup> transport, including paracellular and transcellular pathways. Amiloride, which is a specific inhibitor of ENaCs, was added to the apical saline bath solution to block the ENaCs. Ouabain, which is a specific inhibitor of Na<sup>+</sup>/K<sup>+</sup>-ATPase, was added to the basolateral saline bath solution to block Na<sup>+</sup>/K<sup>+</sup>-ATPase activity. At 37°C, Na<sup>+</sup>-free bath solution and amiloride, but not ouabain, caused an increment in  $R_{TE}$  (Fig. 2a, black line). A drop in  $I_{SC}$  was seen at this time (Fig. 2b, black line). During thermal stress,  $R_{TE}$  was decreased in a two-phase manner in the presence of amiloride, which was similar to the result from the saline group. In contrast, a continuous decrease in  $R_{TE}$  was observed in the presence of Na<sup>+</sup>-free bath solution or ouabain, which could not be divided into two significant phases (Fig. 2a, red line).  $I_{SC}$  at P1 and P2 was observed in the presence of Na<sup>+</sup>-free bath solution or amiloride (Fig.

2b, red line). We computed thermal stress-sensitive  $R_{TE}$  at P1 and P2 ( $\Delta R_{TE}$ , in Fig. 2c), and found that amiloride markedly increased thermal stress-sensitive  $R_{TE}$  at P1 ( $P < 0.01$ ), but there was no significant effects at P2 ( $P = 0.56$ ). Thermal stress caused the continuous reduction of  $R_{TE}$  in the presence of the  $Na^+$ -free bath solution and ouabain, so we calculated thermal stress-sensitive  $R_{TE}$  in the entire procedure ( $\Delta R_{TE}$  in Fig. 2d), and found that  $Na^+$ -free bath solution markedly increased thermal stress-sensitive  $R_{TE}$  and ouabain significantly decreased thermal stress-sensitive  $R_{TE}$  in the entire of procedure (all  $P < 0.05$ ). We calculated thermal stress-sensitive  $I_{SC}$  at P1 and P2 ( $\Delta I_{SC}$ , in Fig. 2e and 2f) and found that thermal stress-sensitive  $I_{SC}$  at P1 was significantly decreased in the presence of  $Na^+$ -free bath solution, amiloride, or ouabain (Fig. 2e, all  $P < 0.05$ ). Additionally,  $Na^+$ -free bath solution and amiloride markedly decreased thermal stress-sensitive  $I_{SC}$  at P2 (Fig. 2f,  $P < 0.001$ ). Because we could not observe the obvious  $I_{SC}$  P2 in the presence of ouabain, we did not calculate thermal stress-sensitive  $I_{SC}$  at P2 in the presence of ouabain. These data indicated that changes in  $R_{TE}$  and  $I_{SC}$  caused by thermal stress may be predominately determined by transcellular  $Na^+$  transport powered by ENaCs and  $Na^+/K^+$ -ATPase. Interestingly, blockade of  $Na^+/K^+$ -ATPase showed lower thermal stress-sensitive  $I_{SC}$  compared with  $Na^+$ -free bath solution. The potential mechanisms of this finding may be the temperature-dependent  $Na^+/K^+$ -ATPase and others, including ENaCs, CFTR, and  $K^+$  channels (KCs). We attempted to further confirm the effects of thermal stress on permeabilized half monolayers. However, neither  $R_{TE}$  nor  $I_{SC}$  levels were stable enough to perform further analysis (Fig. S2).

CFTR is required for thermal stress-induced alteration

We next examined discussed the contribution of epithelial  $Cl^-$  transport to thermal stress-induced alterations in  $R_{TE}$  and  $I_{SC}$  of MTE monolayers. Transcellular  $Cl^-$  transport via apical CFTR comprises majority of transcellular anion flux (Sheppard and Welsh 1999; Fuller and Benos 1992). At  $37^\circ C$ ,  $Cl^-$ -free bath solution or CFTRinh-172 was applied to block overall epithelial  $Cl^-$  transport or CFTR. Blockade of CFTR led to an increment in  $R_{TE}$  and a drop in  $I_{SC}$  (Fig. 3a and 3b, black line). However,  $Cl^-$ -free bath solution caused a transient increment, followed by a slow decline to  $0.24 \pm 0.03 \text{ k}\Omega \times \text{cm}^2$  in  $R_{TE}$  and almost zero in  $I_{SC}$ . Therefore, we could not perform further analysis (Fig. S3). During thermal stress,  $R_{TE}$  and  $I_{SC}$  were changed in a two-phase manner in the presence of CFTRinh-172, which was similar to the saline group (Fig. 3a and 3b, red line). CFTRinh-172 significantly increased thermal stress-sensitive  $R_{TE}$  for

both phases (Fig. 3c, all  $P < 0.01$ ). CFTRinh-172 significantly decreased thermal stress-sensitive  $I_{SC}$  for both phases (Figs. 3d and 3e,  $P < 0.05$ ). These findings suggest that CFTR plays a role in changes in  $R_{TE}$  and  $I_{SC}$  caused by thermal stress.

### Steady state elevated temperature increases transcellular ion channel activity

To confirm the two-phase alteration in  $I_{SC}$  following a gradual rise in bath temperature, we alternatively mounted MTE monolayers to Ussing chambers that were already set at 40°C. Interestingly, elevated and stable total  $I_{SC}$  levels were observed under this steady state, elevated temperature condition, which was different from the two-phase manner when the temperature was gradually elevated (Fig. 4a, 4c, and 4e, basal  $I_{SC}$  of the black line and red line). These observations suggested that the time course for MTE monolayers for exposure to thermal stress determined the severity of impaired transcellular ion transport. To inhibit the activity of ion channels and transporters, including ENaCs, CFTR, and  $Na^+/K^+$ -ATPase, their specific inhibitors, including amiloride, CFTRinh-172, and ouabain, were added to a bath solution at 37°C or 40°C.  $I_{SC}$  was inhibited by these specific inhibitors at 37°C and 40°C (Fig. 4a, 4c, and 4e). We computed total  $I_{SC}$  and specific inhibitor-resistant  $I_{SC}$ , and the difference between these two  $I_{SC}$  reflected the activity of corresponding ion channels or transporters (Figs. 4b, 4d, and 4f). We found that thermal stress increased the activity of ENaCs, CFTR and  $Na^+/K^+$ -ATPase (all  $P < 0.05$ ). We also computed the basal  $R_{TE}$  value and post-inhibitor value applying at 37°C or 40°C (Fig. 4g). The mean basal  $R_{TE}$  level at 40°C ( $0.57 \pm 0.05 \text{ k}\Omega \times \text{cm}^2$ ) was significantly less than that at 37°C ( $1.08 \pm 0.06 \text{ k}\Omega \times \text{cm}^2$ ) ( $P < 0.001$ ). An increase in  $R_{TE}$  was observed in the presence of amiloride and CFTRinh-172 (all  $P < 0.05$ ), but not ouabain (all  $P > 0.05$ ), at 37°C and 40°C. These data suggest that a steady state elevated temperature increases the activity of ENaCs, CFTR, and  $Na^+/K^+$ -ATPase.

### Acrolein downregulates $R_{TE}$ and $I_{SC}$

Our previous studies showed that formaldehyde and crotonaldehyde regulated ENaCs in alveolar epithelial cells (Cui et al. 2016; Li et al. 2017). Acrolein is an industrial chemical of high toxicity and a toxic combustion product (Stevens and Maier 2008), and acrolein concentrations of which can be up to 891.90  $\mu\text{M}$  in fire and tobacco smoke (Ayer and Yeager 1982). Acrolein rapidly causes pulmonary edema in animals at 178.38  $\mu\text{M}$  (Crapo 1981) and results in 100% lethality in mice within 16 h (Leikauf et al. 2011). To examine the effects of acrolein on the permeability of MTE monolayers, acrolein (approximately 500  $\mu\text{M}$ ) was applied to monolayers bathed at 37°C

and at a steady state of 40°C. A total of 500  $\mu\text{M}$  acrolein decreased  $R_{\text{TE}}$  and  $I_{\text{SC}}$  at 37°C and 40°C (Fig. 5a and 5b). To compare the difference in effects of acrolein at 37°C and 40°C, the dose-response curve for acrolein was generated by fitting raw data points with the Hill equation. By fitting raw  $R_{\text{TE}}$  data, we found that the  $K_i$  value for acrolein was 120.22  $\mu\text{M}$  at 37°C and 79.43  $\mu\text{M}$  at 40°C (Fig. 5c). By fitting raw  $I_{\text{SC}}$  data, we found that the  $K_i$  value for acrolein was 125.89  $\mu\text{M}$  at 37°C and 77.62  $\mu\text{M}$  at 40°C (Fig. 5d). In HBE monolayers, a reduction of  $R_{\text{TE}}$  and  $I_{\text{SC}}$  caused by 500  $\mu\text{M}$  acrolein was observed, which was similar to the result from MTE monolayers (Fig. 5e and 5f). In the  $R_{\text{TE}}$  dose-response curve of HBE monolayers, the  $K_i$  value for acrolein was 83.18  $\mu\text{M}$  at 37°C and 97.73  $\mu\text{M}$  at 40°C (Fig. 5g). In the  $I_{\text{SC}}$  dose-response curve of HBE monolayers, the  $K_i$  value for acrolein was 125.89  $\mu\text{M}$  at 37°C and 112.21  $\mu\text{M}$  at 40°C (Fig. 5h). Our data suggest that acrolein impairs airway epithelial permeability in an atypical concentration-dependent manner and an elevated temperature exacerbates this damaging process.

#### $\text{Na}^+$ transport participates in acrolein-induced reduction of $R_{\text{TE}}$ and $I_{\text{SC}}$

We examined the role of epithelial  $\text{Na}^+$  transport on the decrease in  $R_{\text{TE}}$  and  $I_{\text{SC}}$  by acrolein in MTE monolayers. At the basal level of 37°C,  $\text{Na}^+$ -free bath solution, amiloride, or ouabain was used to block overall epithelial  $\text{Na}^+$  transport, ENaCs or  $\text{Na}^+/\text{K}^+$ -ATPase. After pre-inhibition of these  $\text{Na}^+$  transport pathways, 500  $\mu\text{M}$  acrolein was added to the apical bath solution, and changes in  $R_{\text{TE}}$  and  $I_{\text{SC}}$  caused by acrolein were observed. At 37°C,  $\text{Na}^+$ -free bath solution and amiloride, but not ouabain, caused an increment in  $R_{\text{TE}}$  (Fig. 6a, black line). Additionally, a drop in  $I_{\text{SC}}$  induced by  $\text{Na}^+$ -free bath solution, amiloride, and ouabain, was seen observed (Fig. 6b, black line). During exposure of 500  $\mu\text{M}$  acrolein,  $R_{\text{TE}}$  was decreased in the presence of  $\text{Na}^+$ -free bath solution, amiloride, and ouabain (Fig. 6a, blue line). Acrolein continuously decreased  $I_{\text{SC}}$  in the presence of amiloride but showed no obvious effect in the presence of  $\text{Na}^+$ -free bath solution and ouabain (Fig. 6b, blue line). We calculated acrolein-sensitive  $R_{\text{TE}}$  ( $\Delta R_{\text{TE}}$ , Fig. 6c), and found that  $\text{Na}^+$ -free bath solution, amiloride, and ouabain significantly increased acrolein-sensitive  $R_{\text{TE}}$  ( $P < 0.05$ ). Acrolein-sensitive  $I_{\text{SC}}$  ( $\Delta I_{\text{SC}}$ , Fig. 6d) was also computed, and it was significantly decreased by  $\text{Na}^+$ -free bath solution, amiloride, and ouabain (all  $P < 0.01$ ). These data suggest that changes in  $R_{\text{TE}}$  and  $I_{\text{SC}}$  induced by acrolein may be related to transcellular pathways that are mediated by ENaCs and  $\text{Na}^+/\text{K}^+$ -ATPase. CFTR mediates the acrolein-induced reduction in  $R_{\text{TE}}$  and  $I_{\text{SC}}$

1 We further examined the role of CFTR in the decrease in  $R_{TE}$  and  $I_{SC}$  by acrolein in MTE monolayers. At basal level of 37°C, CFTRinh-  
2 172 was used to inhibit CFTR, and then 500  $\mu$ M acrolein was added to the monolayers. Changes in  $R_{TE}$  and  $I_{SC}$  caused by acrolein were  
3 observed. At the basal level, CFTRinh-172 increased  $R_{TE}$  (Fig. 7a, black line) and decreased  $I_{SC}$  (Fig. 7b, black line). During exposure  
4 of acrolein,  $R_{TE}$  and  $I_{SC}$  were decreased (Figs. 7a and 7b, blue line). CFTRinh-172 significantly increased acrolein-sensitive  $R_{TE}$  (Fig.  
5 7c,  $P < 0.01$ ) and markedly decreased acrolein-sensitive  $I_{SC}$  (Fig. 7d,  $P < 0.001$ ). These findings suggest that CFTR may participate in  
6 the reduction of  $R_{TE}$  and  $I_{SC}$  caused by acrolein.

### 7 Thermal stress and acrolein impair tight junctions

8 Our findings suggested that the transcellular pathway is required for the effects of thermal stress and acrolein on permeability of MTE  
9 monolayers. Therefore, we next examined if thermal stress and acrolein affect the paracellular pathway. We observed the structure and  
0 distribution of the tight junction protein ZO-1 in MTE monolayers. In MTE monolayers, ZO-1 is one of the most widely studied scaffold  
1 proteins and is uniformly expressed after an air-liquid interface is achieved (Umeda et al. 2006). Confocal microscopy showed that  
2 thermal stress disrupted the integrity of ZO-1 (Fig. 8e) compared with the control group (Fig. 8b). Damage to the structure of ZO-1 was  
3 also observed in acrolein-treated monolayers (Fig. 8h). Moreover, synergistic treatment of thermal stress and acrolein further exacerbated  
4 the damage to ZO-1 (Fig. 8k) compared with thermal stress (Fig. 8e) or acrolein group (Fig. 8h). We quantified fluorescence intensity  
5 and it was consistent with that from the representative confocal images (Fig. 8m). To determine the effects of thermal stress and acrolein  
6 on cell detachment and death detachment of MTE monolayers, we tested cell number and viability of monolayers post-thermal stress  
7 and after acrolein. We found no significant cell detachment or death under these conditions (Fig. S4, all  $P > 0.05$ ). We examined  
8 expression of occludin and claudins, but their expression levels were insufficient to visualize (Fig. S6). The FITC-dextran assay was  
9 performed to further determine the effects of thermal stress and acrolein on paracellular permeability of MTE monolayers. We found  
0 that thermal stress and acrolein significantly increased the permeability of MTE monolayers to FITC-dextran (Fig. S6p,  $P < 0.001$ ).

## 1 2 Discussion

Smoke inhalation injury is the main cause of death during a fire, and it is an important risk factor for increasing morbidity and mortality (You et al. 2014). Pathogenic factors in inhalation injury, such as heat and toxic chemicals, cause direct injury to the airway epithelial barrier. In this study, we aimed to investigate the effects of thermal stress and acrolein on permeability of the airway epithelial barrier. MTE cells were isolated from mouse trachea and used to culture the model of the air-liquid interface (MTE monolayers). This *in vitro* model mainly contained goblet and cilia cells and imitated the physiological state of the normal airway epithelium (Hou et al. 2019). MTE monolayers are suitable for studying respiratory diseases, and they have been applied in toxicology, respiratory tract infection, ion transport, cell carcinogenesis, and other experiments (Davidson et al. 2000; Horani et al. 2013). In our study,  $R_{TE}$  and  $I_{SC}$  were markedly changed in thermal stress or acrolein-treated MTE monolayers. The changes in  $R_{TE}$  and  $I_{SC}$  caused by thermal stress or acrolein were related to the transcellular pathway, which was mediated by ENaCs, CFTR, and  $Na^+/K^+$ -ATPase. Additionally, thermal stress or acrolein regulated the paracellular pathway, which was mediated by tight junctions. These findings suggest the potential roles of the transcellular and paracellular pathways in thermal stress or acrolein in damaging the airway epithelial barrier. Our findings may provide new directions for the understanding, diagnosis, and treatment of smoke inhalation injury.

Transcellular and paracellular pathways are two essential determinants of  $R_{TE}$  and  $I_{SC}$ . In the current study, during thermal stress,  $R_{TE}$  and  $I_{SC}$  of MTE monolayers were changed in a two-phase (P1 and P2) manner.  $I_{SC}$  was increased at P1, which could have been due to enhanced ion transport by thermal stress. Concurrently, increased permeability led to a reduction in  $R_{TE}$ . The reverse change in  $R_{TE}$  and  $I_{SC}$  indicated that monolayers at P1 still had normal physiological characteristics. Subsequently,  $R_{TE}$  and  $I_{SC}$  were decreased at P2. These findings could have resulted from damaged gap and tight junctions, which were shown by confocal images. Another explanation for our findings is ion diffusion across MTE monolayers upon depletion of ATP. Therefore, we speculate that effects caused by thermal stress are reversible at P1 and irreversible at P2. A previous study provided the basis for our speculation (Tobey et al. 1999) in which increased  $I_{SC}$  and decreased  $R_{TE}$  were observed during application of heat to the esophageal epithelium, and recovery was observed when the temperature returned to 37°C. Cell death and detachment cause increased permeability of monolayers. However, our data from cell counting and viability ruled out this possibility. To overcome the difference between species, we cultured HBE monolayers and

monitored  $R_{TE}$  and  $I_{SC}$ . We found that  $R_{TE}$  of HBE monolayers was decreased by thermal stress, which was similar to the result from MTE monolayers. In contrast, thermal stress increased  $I_{SC}$  of HBE monolayers to a high and stable level, which was similar to P1 in MTE monolayers. However, we could not monitor the decreased trace of  $I_{SC}$  (i.e., P2 in MTE monolayers). These findings indicated that HBE monolayers showed lower thermal sensitivity and higher thermal resistance than primary MTE monolayers.

Various time courses of thermal stress caused obvious different regulation in  $I_{SC}$  in our study. We observed an elevated  $I_{SC}$  trace at P1 and a declined trace at P2 when the temperature was gradually raised to 40°C from 37°C. However, under the condition of a steady state at 40°C, an elevated and stable  $I_{SC}$  trace was visualized instead of two phases. A previous study reported elevated stable  $I_{SC}$  levels of rabbit esophageal epithelium in an Ussing chamber system in which the temperature had already been set to 49°C (Tobey et al. 1999). These divergent responses in  $I_{SC}$  and  $R_{TE}$  to different time courses of thermal stress could be due to the response of the individual transport system to thermal stress. Additionally, host cell adaption to environmental stress could explain the diverse observations between the two time courses for thermal stress. Preheating cells may be already used to thermal stress.

The paracellular and transcellular pathways are vital for establishing or dissipating ion concentration gradients and thus are important for determining the ionic composition of the apical compartment and net volume flow (Flynn et al. 2009). Therefore, both pathways work in concert and are functionally matched to meet the transport requirements of the specific tissue. The paracellular pathway is mainly formed by tight junctions, and this pathway is located near the apical side of the cells and the lateral intercellular space (Tsukita and Furuse 2002; Van Itallie and Anderson 2006). Tight junctions form the functional and structural boundary that separates apical and basolateral compartments and also determine the ion transport properties of the paracellular pathway. Tight junctions are composed of a complex of proteins that determine ion selectivity and conductance of the paracellular pathway (Farquhar and Palade 1963). ZO-1 is one of the most widely studied tight junction protein (Umeda et al. 2006) and is uniformly expressed after the air-liquid interface is achieved (Kuroishi et al. 2009). We found that thermal stress or acrolein decreased ZO-1 expression and disrupted its tight structure, which indicated that thermal stress or acrolein regulated the paracellular ion transport pathway. Inhibitors (e.g., Amiloride, ouabain and CFTRinh-172) can only block ion channels and transporters that belong to the transcellular pathway and inhibit the function of ion



7 transport. Therefore, inhibitors for ENaCs, CFTR, and Na<sup>+</sup>/K<sup>+</sup>-ATPase might not significantly affect these proteins. In our study, the  
8 FITC-dextran flux assay showed increased FITC-dextran permeability in thermal stress or acrolein-treated MTE monolayers. Thermal  
9 stress or acrolein not only damaged the complete structure of the tight junction but also increased its permeability.

0 In the current study, when adding acrolein to an apical bath solution, the bath solution was blown up to 10 times to ensure even  
1 distribution of acrolein instead of gas bubbling. Maintaining bubbling of a bath solution facilitates loss of acrolein. This situation was  
2 supported by our results for comparing two experimental conditions with and without air bubbling (Fig. S5). A total of 500 μM acrolein  
3 adversely affected the integrity of the airway epithelial barrier, which was supported by a reduction in R<sub>TE</sub> and I<sub>SC</sub>, a disrupted ZO-1  
4 structure, as shown by confocal images, and the increased FITC-dextran permeability in MTE monolayers. Therefore, 500 μM acrolein  
5 caused irreversible damage to the airway epithelial barrier. Through a fitted R<sub>TE</sub>/I<sub>SC</sub> dose-response curve for acrolein in MTE monolayers,  
6 we found that the K<sub>i</sub> value for acrolein was lower at 40°C than at 37°C. Therefore, the same dose of acrolein caused more serious damage  
7 to R<sub>TE</sub>/I<sub>SC</sub> under thermal stress conditions compared with 37°C. Moreover, the damage to the integrity and permeability of tight junctions  
8 caused by acrolein was more severe at 40°C than at 37°C. The synergistic effects of thermal stress and acrolein induced further  
9 impairment to the airway epithelial barrier. Our previous studies indicated that oxidative aldehydes, including formaldehyde and  
0 crotonaldehyde, inhibited ENaCs activity by causing activation of reactive oxygen species (ROS) in alveolar epithelium cell monolayers  
1 (Cui et al. 2016; Li et al. 2017). Modulation of antioxidant enzymes affected the thermal sensitivity of respiratory cells. Additionally,  
2 lowering superoxide dismutase enzyme levels resulted in a significant reduction in thermal resistance (Omar et al. 1987). However,  
3 overexpression of manganese superoxide dismutase by stable transfection provided cellular resistance against the cytotoxic effect of  
4 hyperthermia (Li and Oberley 1997; Kuninaka et al. 2000). Therefore, the synergistic effect of thermal stress and acrolein in the present  
5 study may have resulted from increased thermal sensitivity to cells, which was caused by acrolein-activated oxidative signaling.

6 As mentioned above, damage to the airway epithelium due to acrolein mainly results from its downstream signal via cellular  
7 oxidative stress, such as glutathione depletion, and subsequently ROS simulation (Wang et al. 2009). In addition to ENaCs, Na<sup>+</sup>/K<sup>+</sup>-  
8 ATPase, and CFTR, some other proteins, including KCs, Ca<sup>2+</sup>-activated Cl<sup>-</sup> channels (CaCCs), SCL26A9, and Na<sup>+</sup>/K<sup>+</sup>/2Cl<sup>-</sup> (NKCC),

9 play roles in ion transport in the respiratory epithelium. And these proteins may be regulated by acrolein by induction of oxidative stress  
0 (Londino et al. 2017). As the major  $\text{Ca}^{2+}$ -activated KCs of ciliated cells,  $\text{K}_{\text{Ca}1.1}/\text{KCNMA1}$  plays a role in maintaining fluid secretion  
1 and is affected by oxidative stress (Manzanares et al. 2011; Kis et al. 2016; Hermann et al. 2015). Moreover, exposure to tobacco smoke  
2 inhibits  $\text{K}_{\text{Ca}1.1}/\text{KCNMA1}$  and resulted in a reduction in airway surface liquid in human bronchial epithelial cells (Sailland et al. 2017).  
3 Anoctamin 6 functions as a  $\text{CaCCs}$ , as well as a  $\text{Ca}^{2+}$ -dependent phospholipid scramblase, which are stimulated by an increase in ROS  
4 and subsequent peroxidation of membrane lipids (Schreiber and Ousingsawat 2018; Scudieri et al. 2015). NKCC is located on the  
5 basolateral membrane of the tracheal epithelium and is an important conduit for  $\text{Cl}^-$  entry in the liquid-transporting epithelium (Gillie et  
6 al. 2001). A previous study reported that NKCC activation may contribute to the protective system against ROS-mediated damage to  
7 the airway epithelium (Matsuno et al. 2008). These studies may provide proof of acrolein damaging KCs,  $\text{CaCCs}$ , and NKCC in the  
8 airway epithelium.

9 In addition to the effects of smoke inhalation on the tracheal epithelium, we also found interactions between different ion transport  
0 systems. Apical and basolateral ion transport systems play diverse roles in the relationship between  $R_{\text{TE}}$  and  $I_{\text{SC}}$ . In our study, blockade  
1 of  $\text{Na}^+$  entry or  $\text{Cl}^-$  secretion via apical ENaCs and CFTR, respectively, caused a reciprocal change in  $R_{\text{TE}}$  and  $I_{\text{SC}}$ . In contrast, inhibition  
2 of basolateral  $\text{Na}^+/\text{K}^+$ -ATPase resulted in a reduction in  $R_{\text{TE}}$  and  $I_{\text{SC}}$ . Additionally, a  $\text{Cl}^-$ -free solution showed a similar effect as ouabain  
3 in inhibiting  $I_{\text{SC}}$ . This finding indicates the potential dependence of  $\text{Na}^+/\text{K}^+$ -ATPase on anion transport or interactions between vertical  
4  $\text{Cl}^-$  and  $\text{K}^+$  transporters. It can be excluded for the associations between  $\text{Cl}^-$  and  $\text{Na}^+$  transporters because a  $\text{Na}^+$ -free solution led to an  
5 opposite effect on  $R_{\text{TE}}$  and  $I_{\text{SC}}$ . Our study showed that the apical ENaCs and CFTR modulated  $R_{\text{TE}}$ .

6 There are some limitations to this study, which need to be addressed in the future. Although the MTE *in vitro* model imitates the  
7 physiological state and complies with the morphological characteristics of the normal airway epithelium, there are still some differences  
8 from the *in vivo* environment. However, an *in vivo* model does not allow us to precisely measure  $R_{\text{TE}}$  and  $I_{\text{SC}}$ . Future studies need to  
9 focus on the effects of thermal stress or acrolein on inflammatory signal transduction pathways at the molecular level. In addition to the  
0 oxidative stress pathway, the mitogen-activated protein kinase (MAPK) pathway appears to play a role in regulating the airway epithelial

1 barrier (Huang et al. 2016; Lee et al. 2018). A previous study suggested that MAPK Hog1 phosphorylation was activated to a peak at  
2 approximately 5 min after heat shock, and phosphorylated Hog1 declined to the basal level at 30 min (Dunayevich et al. 2018).  
3 Researchers reached a similar conclusion in another study, where they found that heat-activated MAPK signaling was elevated to a peak  
4 at 5 min, and activation was weakened or even disappeared over time (Dong et al. 2015). In the present study, application of thermal  
5 stress to MTE monolayers caused a bi-phasic change, which indicated a sophisticated condition and a long time course. An *in vivo* model  
6 can show higher sensitivity and resistance to thermal stress than an *in vitro* model. Therefore, we ultimately to perform an *in vivo* study  
7 of thermal stress or acrolein-induced MAPK signaling.

8 Thermal stress and acrolein are the two main pathogenic factors of smoke inhalation injury. Our study suggests that these two factors  
9 damage the integrity of the airway epithelial barrier. The underlying mechanisms are related to the transcellular pathway (mediated by  
0 ion channels and transporters) and the paracellular pathway (mediated by tight junctions). Moreover, to the best of our knowledge, we  
1 have shown for the first time the synergistic effect of thermal stress and acrolein on impairment of the airway epithelial barrier.

2  
3 **Authors' contributions** Hong-Long Ji conceived study, designed experiments, edited manuscript, and approved submission. Jianjun  
4 Chang, Zaixing Chen, and Hong-Guang Nie performed experiments, analyzed data, and plotted graphs. Jianjun Chang, Runzhen Zhao,  
5 Hong-Guang Nie, and Zaixing Chen prepared manuscript.

#### 6 **Compliance with ethical standards**

7 **Conflict of interest** No conflicts of interest, financial or otherwise, are declared by the authors.

8  
9 **Abbreviations** ENaCs, epithelial Na<sup>+</sup> channels; CFTR, cystic fibrosis transmembrane regulator; R<sub>TE</sub>, transepithelial resistance; I<sub>sc</sub>,  
0 short-circuit current; MTE, mouse tracheal epithelial; FITC, fluorescein isothiocyanate; HBE, human bronchial epithelial; DMSO,  
1

---

2 dimethyl sulfoxide; ZO-1, zonula occludens-1; P1, phase 1; P2, phase 2; ASI, amiloride-sensitive I<sub>sc</sub>; KCs, K<sup>+</sup> channels; ROS, reactive  
3 oxygen species; CaCCs, Ca<sup>2+</sup>-activated Cl<sup>-</sup> channels; NKCC, Na<sup>+</sup>/K<sup>+</sup>/2Cl<sup>-</sup>; MAPK, mitogen-activated protein kinase.

4  
5  
6  
7  
8  
9  
0  
1  
2  
3  
4  
5  
6  
7  
8  
9  
0  
1  
2  
3  
4  
5  
6  
7  
8  
9  
0  
1  
2  
3  
4  
5  
6  
7  
8  
9  
0  
1  
2  
3

## References

- Alexander NS, Blount A, Zhang S, Skinner D, Hicks SB, Chestnut M, et al. Cystic fibrosis transmembrane conductance regulator modulation by the tobacco smoke toxin acrolein. *Laryngoscope*. 2012;122:1193-7.
- Alwis KU, deCastro BR, Morrow JC, Blount BC. Acrolein Exposure in U.S. Tobacco Smokers and Non-Tobacco Users: NHANES 2005-2006. *Environ Health Perspect*. 2015;123:1302-8.
- Anthony TR, Joggerst P, James L, Burgess JL, Leonard SS, Shogren ES. Method development study for APR cartridge evaluation in fire overhaul exposures. *Ann Occup Hyg*. 2007;51:703-16.
- Ayer HE, Yeager DW. Irritants in cigarette smoke plumes. *Am J Public Health*. 1982;72:1283-5.
- Bardou O, Trinh NT, Brochiero E. Molecular diversity and function of K<sup>+</sup> channels in airway and alveolar epithelial cells. *Am J Physiol Lung Cell Mol Physiol*. 2009;296:L145-55.
- Bein K, Leikauf GD. Acrolein - a pulmonary hazard. *Mol Nutr Food Res*. 2011;55:1342-60.
- Borchers MT, Wert SE, Leikauf GD. Acrolein-induced MUC5ac expression in rat airways. *Am J Physiol*. 1998;274:L573-81.
- Chang J, Ding Y, Zhou Z, Nie HG, Ji HL. Transepithelial Fluid and Salt Re-Absorption Regulated by cGK2 Signals. *Int J Mol Sci*. 2018;19:E881.
- Chen Z, Zhao R, Zhao M, Liang X, Bhattarai D, Dhiman R, et al. Regulation of epithelial sodium channels in urokinase plasminogen activator deficiency. *Am J Physiol Lung Cell Mol Physiol*. 2014;307:L609-17.
- Crapo RO. Smoke-inhalation injuries. *JAMA*. 1981;246:1694-6.
- Cui Y, Li H, Wu S, Zhao R, Du D, Ding Y, et al. Formaldehyde impairs transepithelial sodium transport. *Sci Rep*. 2016;6:35857.
- Davidson DJ, Kilanowski FM, Randell SH, Sheppard DN, Dorin JR. A primary culture model of differentiated murine tracheal epithelium. *Am J Physiol Lung Cell Mol Physiol*. 2000;279(4):L766-78.
- Dong ZW, Chen J, Ruan YC, Zhou T, Chen Y, Chen Y, et al. CFTR-regulated MAPK/NF-kappaB signaling in pulmonary inflammation in thermal inhalation injury. *Sci Rep*. 2015;5:15946
- Dubick MA, Carden SC, Jordan BS, Langlinais PC, Mozingo DW. Indices of antioxidant status in rats subjected to wood smoke inhalation and/or thermal injury. *Toxicology*. 2002;176(1-2):145-57.
- Dunayevich P, Baltanas R, Clemente JA, Couto A, Sapochnik D, Vasen G, et al. Heat-stress triggers MAPK crosstalk to turn on the hyperosmotic response pathway. *Sci Rep*. 2018;8(1):15168.
- Farquhar MG, Palade GE. Junctional complexes in various epithelia. *The Journal of cell biology*. 1963;17:375-412.
- Fitzgerald KT, Flood AA. Smoke inhalation. *Clin Tech Small Anim Prac*. 2006;21:205-14.
- Flynn AN, Itani OA, Moninger TO, Welsh MJ. Acute regulation of tight junction ion selectivity in human airway epithelia. *Proc Natl Acad Sci U S A*. 2009;106:3591-6.
- Fuller CM, Benos DJ. CFTR! *Am J Physiol*. 1992;263:C267-86.
- Gillie DJ, Pace AJ, Coakley RJ, Koller BH, Barker PM. Liquid and ion transport by fetal airway and lung epithelia of mice deficient in sodium-potassium-2-chloride transporter. *Am J Respir Cell Mol Biol*. 2001;25(1):14-20.
- Hales CA, Barkin PW, Jung W, Trautman E, Lamborghini D, Herrig N, et al. Synthetic smoke with acrolein but not HCl produces pulmonary edema. *J Appl Physiol* (1985). 1988;64:1121-33.
- Han DY, Nie HG, Gu X, Nayak RC, Su XF, Fu J, et al. K<sup>+</sup> channel openers restore verapamil-inhibited lung fluid resolution and transepithelial ion transport. *Respir Res*. 2010;11:65.
- Haponik EF. Clinical smoke inhalation injury: pulmonary effects. *Occup Med*. 1993;8:430-68.
- Hermann A, Sitdikova GF, Weiger TM. Oxidative Stress and Maxi Calcium-Activated Potassium (BK) Channels. *Biomolecules*. 2015;5(3):1870-911.
- Horani A, Dickinson JD, Brody SL. Applications of mouse airway epithelial cell culture for asthma research. *Methods Mol Biol*. 2013;1032:91-107.
- Hou Y, Cui Y, Zhou Z, Liu H, Zhang H, Ding Y, et al. Upregulation of the WNK4 Signaling Pathway Inhibits Epithelial Sodium Channels

- of Mouse Tracheal Epithelial Cells After Influenza A Infection. *Front Pharmacol.* 2019;10:12.
- Howard M, Roux J, Iles KE, Miyazawa B, Christiaans S, Anjum N, et al. Activation of the heat shock response attenuates the interleukin 1beta-mediated inhibition of the amiloride-sensitive alveolar epithelial ion transport. *Shock.* 2013;39:189-96.
- Huang W, Zhao H, Dong H, Wu Y, Yao L, Zou F, et al. High-mobility group box 1 impairs airway epithelial barrier function through the activation of the RAGE/ERK pathway. *Int J Mol Med.* 2016;37(5):1189-98.
- Kis A, Krick S, Baumlin N, Salathe M. Airway Hydration, Apical K(+) Secretion, and the Large-Conductance, Ca(2+)-activated and Voltage-dependent Potassium (BK) Channel. *Ann Am Thorac Soc.* 2016;13 Suppl 2:S163-8.
- Kuninaka S, Ichinose Y, Koja K, Toh Y. Suppression of manganese superoxide dismutase augments sensitivity to radiation, hyperthermia and doxorubicin in colon cancer cell lines by inducing apoptosis. *Br J Cancer.* 2000;83(7):928-34.
- Kuroishi S, Suda T, Fujisawa T, Ide K, Inui N, Nakamura Y, et al. Epithelial-mesenchymal transition induced by transforming growth factor-beta1 in mouse tracheal epithelial cells. *Respirology.* 2009;14:828-37.
- Lee KE, Jee HM, Hong JY, Kim MN, Oh MS, Kim YS, et al. German Cockroach Extract Induces Matrix Metalloproteinase-1 Expression, Leading to Tight Junction Disruption in Human Airway Epithelial Cells. *Yunsei Med J.* 2018;59(10):1222-31.
- Leikauf GD, Concel VJ, Liu P, Bein K, Berndt A, Ganguly K, et al. Haplotype association mapping of acute lung injury in mice implicates activin a receptor, type 1. *Am J Respir Crit Care Med.* 2011;183:1499-509.
- Li JJ, Oberley LW. Overexpression of manganese-containing superoxide dismutase confers resistance to the cytotoxicity of tumor necrosis factor alpha and/or hyperthermia. *Cancer Res.* 1997;57(10):1991-8.
- Li Y, Chang J, Cui Y, Zhao R, Ding Y, Hou Y, et al. Novel mechanisms for crotonaldehyde-induced lung edema. *Oncotarget.* 2017;8:83509-22.
- Londino JD, Lazrak A, Collawn JF, Bebok Z, Harrod KS, Matalon S. Influenza virus infection alters ion channel function of airway and alveolar cells: mechanisms and physiological sequelae. *Am J Physiol Lung Cell Mol Physiol.* 2017;313(5):L845-158.
- Manzanares D, Gonzalez C, Ivonnet P, Chen RS, Valencia-Gattas M, Conner GE, et al. Functional apical large conductance, Ca2+-activated, and voltage-dependent K+ channels are required for maintenance of airway surface liquid volume. *J Biol Chem.* 2011;286(22):19830-9.
- Matsuno T, Ito Y, Ohashi T, Morise M, Takeda N, Shimokata K, et al. Dual pathway activated by tert-butyl hydroperoxide in human airway anion secretion. *J Pharmacol Exp Ther.* 2008;327(2):453-64.
- Meacher DM, Menzel DB. Glutathione depletion in lung cells by low-molecular-weight aldehydes. *Cell Biol Toxicol.* 1999;15:163-71.
- Nie HG, Chen L, Han DY, Li J, Song WF, Wei SP, et al. Regulation of epithelial sodium channels by cGMP/PKGII. *J Physiol.* 2009;587:2663-76
- Omar RA, Yano S, Kikkawa Y. Antioxidant enzymes and survival of normal and simian virus 40-transformed mouse embryo cells after hyperthermia. *Cancer Res.* 1987;47(13):3473-6.
- Reinhardt TE, Ottmar RD. Baseline measurements of smoke exposure among wildland firefighters. *J Occup Environ Hyg.* 2004;1:593-606.
- Romet-Haddad S, Marano F, Blanquart C, Baeza-Squiban A. Tracheal epithelium in culture: a model for toxicity testing of inhaled molecules. *Cell Biol Toxicol.* 1992;8:141-50.
- Roux E, Ouedraogo N, Hyvelin JM, Savineau JP, Marthan R. In vitro effect of air pollutants on human bronchi. *Cell Biol Toxicol.* 2002;18:289-99.
- Sailland J, Grosche A, Baumlin N, Dennis JS, Schmid A, Krick S, et al. Role of Smad3 and p38 Signalling in Cigarette Smoke-induced CFTR and BK dysfunction in Primary Human Bronchial Airway Epithelial Cells. *Sci Rep.* 2017;7(1):10506.
- Schreiber R, Ousingsawat J. Regulation of TMEM16A/ANO1 and TMEM16F/ANO6 ion currents and phospholipid scrambling by Ca(2+) and plasma membrane lipid. *J Physiol.* 2018;596(2):217-29.
- Scudieri P, Caci E, Venturini A, Sondo E, Pianigiani G, Marchetti C, et al. Ion channel and lipid scramblase activity associated with expression of TMEM16F/ANO6 isoforms. *J Physiol.* 2015;593(17):3829-48.
- Sheppard DN, Welsh MJ. Structure and function of the CFTR chloride channel. *Physiol Rev.* 1999;79:S23-45.

- 2 Stevens JF, Maier CS. Acrolein: sources, metabolism, and biomolecular interactions relevant to human health and disease. *Mol Nutr*  
3 *Food Res.* 2008;52:7-25.
- 4 Szkotak AJ, Ng AM, Sawicka J, Baldwin SA, Man SF, Cass CE, et al. Regulation of K(+) current in human airway epithelial cells by  
5 exogenous and autocrine adenosine. *Am J Physiol Cell Physiol.* 2001;281:C1991-2002.
- 6 Tobey NA, Sikka D, Marten E, Caymaz-Bor C, Hosseini SS, Orlando RC. Effect of heat stress on rabbit esophageal epithelium. *Am J*  
7 *Physiol.* 1999;276:G1322-30.
- 8 Tsukita S, Furuse M. Claudin-based barrier in simple and stratified cellular sheets. *Curr Opin Cell Biol.* 2002;14:531-6.
- 9 Umeda K, Ikenouchi J, Katahira-Tayama S, Furuse K, Sasaki H, Nakayama M, et al. ZO-1 and ZO-2 independently determine where  
0 claudins are polymerized in tight-junction strand formation. *Cell.* 2006;126:741-54.
- 1 Van Itallie CM, Anderson JM. Claudins and epithelial paracellular transport. *Annu Rev Physiol.* 2006;68:403-29.
- 2 Wang T, Liu Y, Chen L, Wang X, Hu XR, Feng YL, et al. Effect of sildenafil on acrolein-induced airway inflammation and mucus  
3 production in rats. *European Respir J.* 2009;33(5):1122-32.
- 4 Wang X, Adler KB, Erjefalt J, Bai C. Airway epithelial dysfunction in the development of acute lung injury and acute respiratory distress  
5 syndrome. *Expert Rev Respir Med.* 2007;1:149-55.
- 6 Wang Y, Bai C, Li K, Adler KB, Wang X. Role of airway epithelial cells in development of asthma and allergic rhinitis. *Respir Med.*  
7 2008;102:949-55
- 8 You K, Yang HT, Kym D, Yoon J, HaejunYim, Cho YS, et al. Inhalation injury in burn patients: establishing the link between diagnosis  
9 and prognosis. *Burns.* 2014;40:1470-5.

6 **Figure Legends**

7 **Fig. 1 Thermal stress alternates bioelectric features in mouse tracheal epithelial (MTE) and human bronchial epithelial (HBE)**

8 **monolayers. (a)** Representative transepithelial resistance ( $R_{TE}$ ) trace in MTE monolayer mounted on an Ussing chamber setup.  $R_{TE}$  was  
9 decreased in a two-phase manner (P1 and P2 were labeled) during the temperature of the bath solution was raised to 40°C (red line)  
0 from 37°C (black line). When the temperature rose to 38.5°C, the changes in  $R_{TE}$  and  $I_{SC}$  were observed, and it took 4.7 min for the  
1 course from 37°C to 40°C. **(b)** Short-circuit current ( $I_{SC}$ ) trace recorded simultaneously in the same MTE monolayer. P1 and P2 of  $I_{SC}$   
2 were defined using the  $R_{TE}$  time course.  $I_{SC}$  was increased at P1 and decreased at P2. **(c)** Average  $R_{TE}$  levels of MTE monolayers at  
3 different time points during thermal stress. Student's t-test. \*\*\* $P < 0.001$ .  $n = 20$ . **(d)** Average  $I_{SC}$  levels of MTE monolayers. Student's  
4 t-test. \*\*\* $P < 0.001$ .  $n = 20$ . **(e)** Time for reducing half of the total  $R_{TE}$  ( $\tau_{1/2}$ ). The  $\tau_{1/2}$  value was computed by fitting  $R_{TE}$  raw data with  
5 the ExpDec1 function. ( $y_0 = 0.36 \pm 0.04$ ,  $A = 0.87 \pm 0.04$  [P1];  $y_0 = -0.87 \pm 0.11$ ,  $A = 3.22 \pm 0.36$  [P2]). Student's t-test. \*\*\* $P < 0.001$ .  $n$   
6 = 12. **(f)** Representative  $R_{TE}$  trace in HBE monolayer.  $R_{TE}$  was decreased during the temperature of the bath solution was elevated to  
7 40°C (red line) from 37°C (black line). **(g)**  $I_{SC}$  trace recorded simultaneously in the same HBE monolayer.  $I_{SC}$  was increased to a high  
8 and stable level during thermal stress. **(h)** Average  $R_{TE}$  levels of HBE monolayers under the conditions of 37°C and 40°C. Student's t-  
9 test.  $n = 6$ . **(i)** Average  $I_{SC}$  levels of HBE monolayers. Student's t-test. \* $P < 0.05$ .  $n = 6$ .

1 **Fig. 2 Na<sup>+</sup> transport mediates thermal stress-induced bioelectric changes in MTE monolayers. (a, b)** Representative  $R_{TE}$  and  $I_{SC}$

2 traces in the presence of saline bath solution (control group, solid line), Na<sup>+</sup>-free bath solution (dashed lines), amiloride (Amil, 100  $\mu$ M,  
3 dotted lines), or ouabain (1 mM, dashed-dotted lines). At 37°C (black lines), Na<sup>+</sup>-free bath solution, amiloride or ouabain was applied  
4 at the time pointed by the arrow. And the temperature of the bath solution was elevated to 40°C (red lines). When the temperature rose  
5 to 38.5°C, the changes in  $R_{TE}$  and  $I_{SC}$  were observed. **(c)** Average thermal stress-sensitive  $R_{TE}$  levels ( $\Delta R_{TE}$ , the difference between the  
6 initial  $R_{TE}$  and ending  $R_{TE}$  within one phase (P1 or P2)). Mann-Whitney U test and Student's t-test. \*\* $P < 0.01$ . NS, no significance.  $n =$   
7 27. **(d)** Average thermal stress-sensitive  $R_{TE}$  levels ( $\Delta R_{TE}$ , the difference between the initial  $R_{TE}$  and ending  $R_{TE}$  during the entire process



of thermal stress). Student's t-test.  $*P < 0.05$  and  $**P < 0.01$ .  $n = 17$ . **(e)** Average thermal stress-sensitive  $I_{SC}$  levels at P1 ( $\Delta I_{SC}$ , the difference between the basal  $I_{SC}$  and the peak  $I_{SC}$  at P1). Student's t-test.  $*P < 0.05$  and  $***P < 0.001$ .  $n = 29$ . **(f)** Average thermal stress-sensitive  $I_{SC}$  levels at P2 ( $\Delta I_{SC}$ , the difference between the peak  $I_{SC}$  and the ending  $I_{SC}$  at P2). Student's t-test.  $***P < 0.001$ .  $n = 20$ .

**Fig. 3 CFTR is involved in thermal stress-induced bioelectric changes in MTE monolayers (a, b)** Representative  $R_{TE}$  and  $I_{SC}$  traces in the presence of saline bath solution (control group, solid line) and CFTRinh-172 (CFTRinh, 20  $\mu$ M, dashed line). Segments of traces recorded at different bath temperatures were shown as black (37°C) and red lines (40°C). Arrows indicated the time to add CFTRinh-172. When the temperature rose to 38.5°C, the obvious bioelectric changes were observed. **(c)** Average thermal stress-sensitive  $R_{TE}$  levels ( $\Delta R_{TE}$ , the difference between the initial  $R_{TE}$  and ending  $R_{TE}$  within one phase [P1 or P2]). Student's t-test.  $**P < 0.01$  and  $***P < 0.001$ .  $n = 18$ . **(d)** Average thermal stress-sensitive  $I_{SC}$  levels at P1 ( $\Delta I_{SC}$ , the difference between the basal  $I_{SC}$  and the peak  $I_{SC}$  at P1). Student's t-test.  $*P < 0.05$ .  $n = 9$ . **(e)** Average thermal stress-sensitive  $I_{SC}$  levels at P2 ( $\Delta I_{SC}$ , the difference between the peak  $I_{SC}$  and the ending  $I_{SC}$  at P2). Student's t-test.  $*P < 0.05$ .  $n = 9$ .

**Fig. 4. Activation of ENaCs, CFTR, and  $Na^+K^+$ -ATPase of MTE monolayers by thermal stress. (a, c, and e)** Representative  $I_{SC}$  traces before and after the addition of amiloride (100  $\mu$ M), CFTRinh (20  $\mu$ M), or ouabain (1 mM) at 37°C (black lines) and 40°C (red lines). Arrows indicated the time to add inhibitors. **(b, d and f)** Average  $I_{SC}$  levels. Total  $I_{SC}$  meant the basal  $I_{SC}$  level; +Amil  $I_{SC}$ , +CFTRinh  $I_{SC}$ , and +Ouabain  $I_{SC}$  meant inhibitor-resistant  $I_{SC}$  level; ASI (amiloride-sensitive  $I_{SC}$ ), CFTRinh  $I_{SC}$  and Ouabain  $I_{SC}$  respectively reflected the activity of each ion channel and was calculated by the difference between the basal  $I_{SC}$  and inhibitor-resistant  $I_{SC}$ . Student's t-test and Mann-Whitney U test.  $*P < 0.05$  and  $**P < 0.01$ . NS, no significance.  $n = 18$ . **(g)** Average  $R_{TE}$  levels. Student's t-test and Mann-Whitney U test.  $*P < 0.05$  and  $***P < 0.001$ . NS, no significance.  $n = 36$ .

**Fig. 5 Acrolein impairs bioelectric features in MTE and HBE monolayers. (a, b)** Representative  $R_{TE}$  and  $I_{SC}$  traces in the presence

of 5, 50, and 500  $\mu\text{M}$  acrolein at 37°C (black lines) and 40°C (red lines) in MTE monolayers. Acrolein (ACR, 5, 50, and 500  $\mu\text{M}$ ) was pipetted to the bath as indicated by arrows. 500  $\mu\text{M}$  acrolein decreased  $R_{\text{TE}}$  and  $I_{\text{SC}}$ . **(c, d)** Dose-response curve for acrolein in MTE monolayers. Normalized  $R_{\text{TE}}/I_{\text{SC}}$  points were fitted with the Hill equation ( $START = 1$ ,  $END = 0$ ,  $n = 22$ ). The  $K_i$  value of  $R_{\text{TE}}$  for acrolein was 120.22  $\mu\text{M}$  at 37°C and 79.43  $\mu\text{M}$  at 40°C; The  $K_i$  value of  $I_{\text{SC}}$  for acrolein was 125.89  $\mu\text{M}$  at 37°C and 77.62  $\mu\text{M}$  at 40°C. **(e, f)** Representative  $R_{\text{TE}}$  and  $I_{\text{SC}}$  traces of HBE monolayers in the presence of 5, 50, and 500  $\mu\text{M}$  acrolein under conditions of 37°C (black line) and 40°C (red line). Arrows indicated the time to add acrolein (ACR, 5, 50, and 500  $\mu\text{M}$ ).  $R_{\text{TE}}$  and  $I_{\text{SC}}$  were decreased by 500  $\mu\text{M}$  acrolein. **(g, h)** Dose-response curve for acrolein in HBE monolayers. Normalized  $R_{\text{TE}}/I_{\text{SC}}$  points were fitted by the Hill equation ( $START = 1$ ,  $END = 0$ ,  $n = 2$ ). The  $K_i$  value of  $R_{\text{TE}}$  for acrolein was 83.18  $\mu\text{M}$  at 37°C and 97.73  $\mu\text{M}$  at 40°C, respectively; the  $K_i$  value of  $I_{\text{SC}}$  for acrolein was 125.89  $\mu\text{M}$  at 37°C and 112.21  $\mu\text{M}$  at 40°C, respectively.

**Fig. 6 Na<sup>+</sup> transport is involved in acrolein-impaired bioelectric features in MTE monolayers.** **(a, b)** Representative  $R_{\text{TE}}$  and  $I_{\text{SC}}$  traces in the presence of saline bath solution (control group, solid lines), Na<sup>+</sup>-free bath solution (dashed lines), amiloride (Amil, 100  $\mu\text{M}$ , dotted lines), or ouabain (1 mM, dashed-dotted line). At basal level (black lines), Na<sup>+</sup>-free bath solution, amiloride or ouabain was applied at the time pointed by the arrow. And then 500  $\mu\text{M}$  acrolein (ACR, blue lines) was added. **(c)** Average acrolein-sensitive  $R_{\text{TE}}$  levels ( $\Delta R_{\text{TE}}$ , the difference between basal  $R_{\text{TE}}$  and acrolein-resistant  $R_{\text{TE}}$ ). Mann-Whitney U test. \* $P < 0.05$ .  $n = 16$ . **(d)** Average acrolein-sensitive  $I_{\text{SC}}$  levels ( $\Delta I_{\text{SC}}$ , the difference between basal  $I_{\text{SC}}$  and acrolein-resistant  $I_{\text{SC}}$ ). Student's t-test. \*\* $P < 0.01$  and \*\*\* $P < 0.001$ .  $n = 16$ .

**Fig. 7 CFTR mediates acrolein-impaired bioelectric features in MTE monolayers.** **(a, b)** Representative  $R_{\text{TE}}$  and  $I_{\text{SC}}$  traces in the presence of saline bath solution (control group, solid lines) and CFTRinh-172 (20  $\mu\text{M}$ , dashed lines). Arrows showed the time for adding CFTRinh-172. Then monolayers were exposed to 500  $\mu\text{M}$  acrolein (ACR, blue lines). **(c)** Average acrolein-sensitive  $R_{\text{TE}}$  levels ( $\Delta R_{\text{TE}}$ , the difference between basal  $R_{\text{TE}}$  and acrolein-resistant  $R_{\text{TE}}$ ). Student's t-test. \*\* $P < 0.01$ .  $n = 11$ . **(d)** Average acrolein-sensitive  $I_{\text{SC}}$  levels

2 ( $\Delta I_{sc}$ , the difference between basal  $I_{sc}$  and acrolein-resistant  $I_{sc}$ ). Student's t-test. \*\*\* $P < 0.001$ .  $n = 11$ .

3

4 **Fig. 8 The synergistic effect of thermal stress and acrolein on ZO-1 tight junction in MTE monolayers.** Laser scanning confocal  
5 imaging for ZO-1 protein in MTE monolayers treated by 37°C (**a-c**), 40°C for 120 min (**d-f**), 500  $\mu$ M acrolein (**g-i**), and combination of  
6 40°C and 500  $\mu$ M acrolein (**j-l**). Nucleus was labeled with hoechst (blue), and tight junction was labeled with ZO-1 (green). Scale bar:  
7 50  $\mu$ m. (**m**) Quantification of ZO-1 fluorescence intensity. Student's t-test. \* $P < 0.05$ , \*\*\* $P < 0.001$ , & $P < 0.05$  and # $P < 0.05$ .  $n = 12$ .

Fig. 1

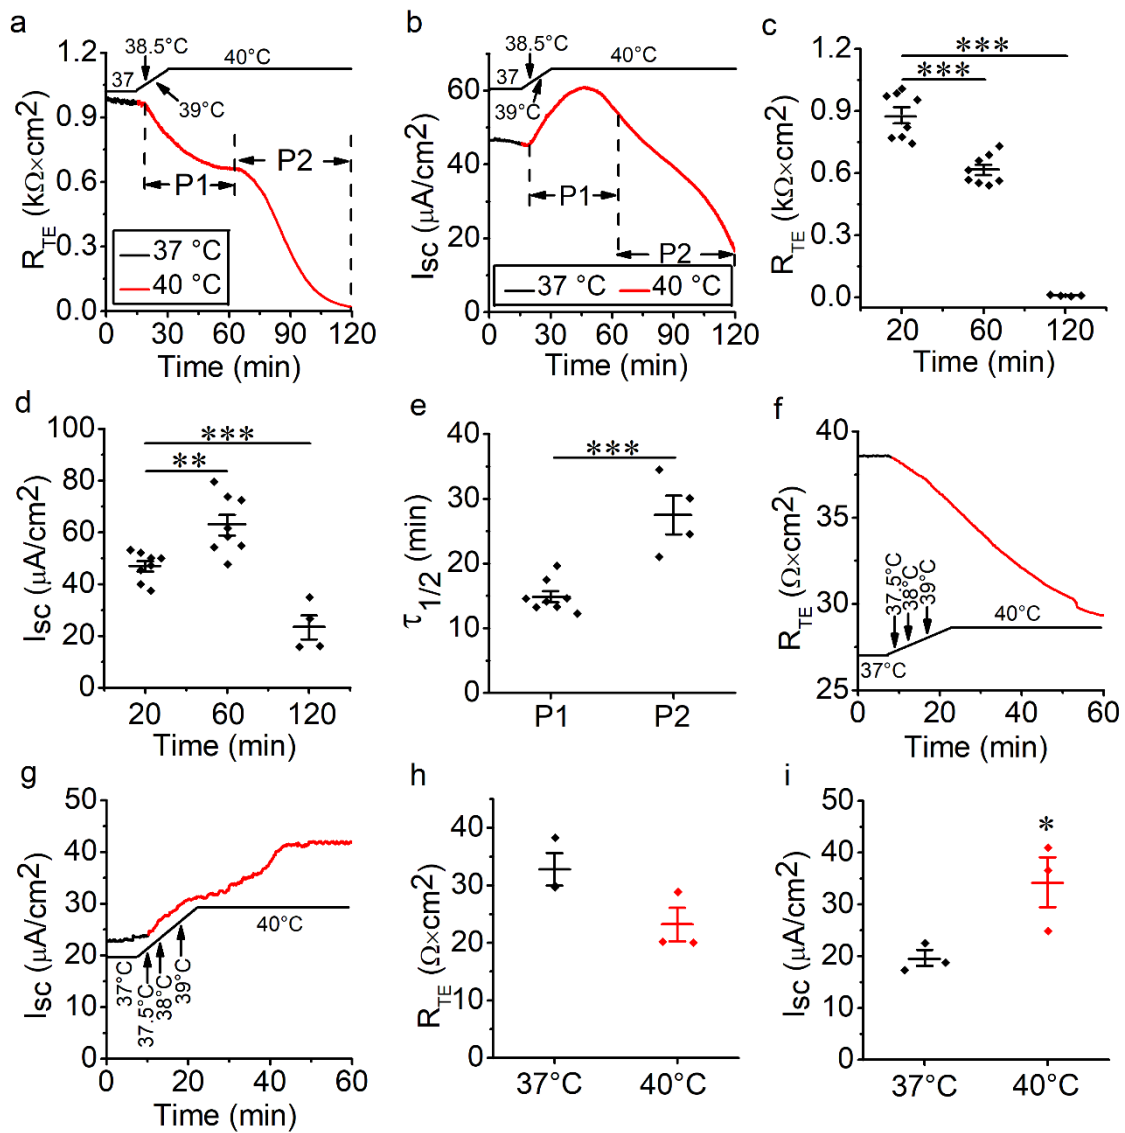

Fig. 2

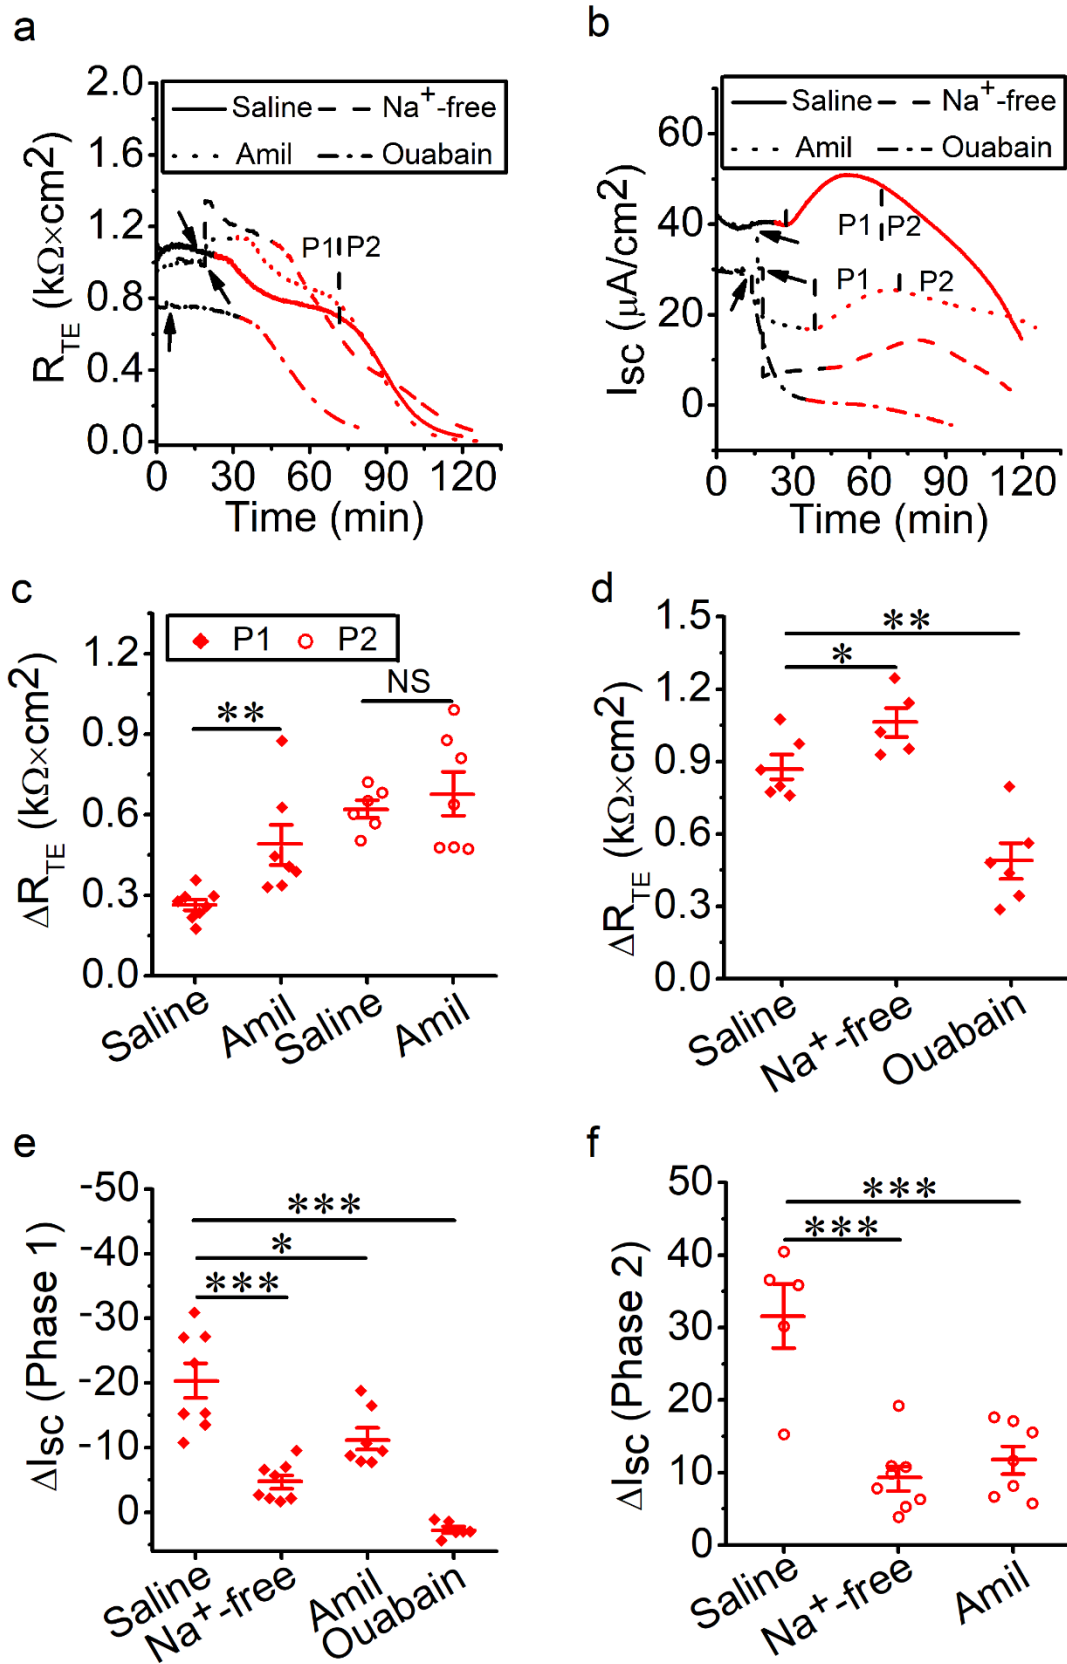

Fig. 3

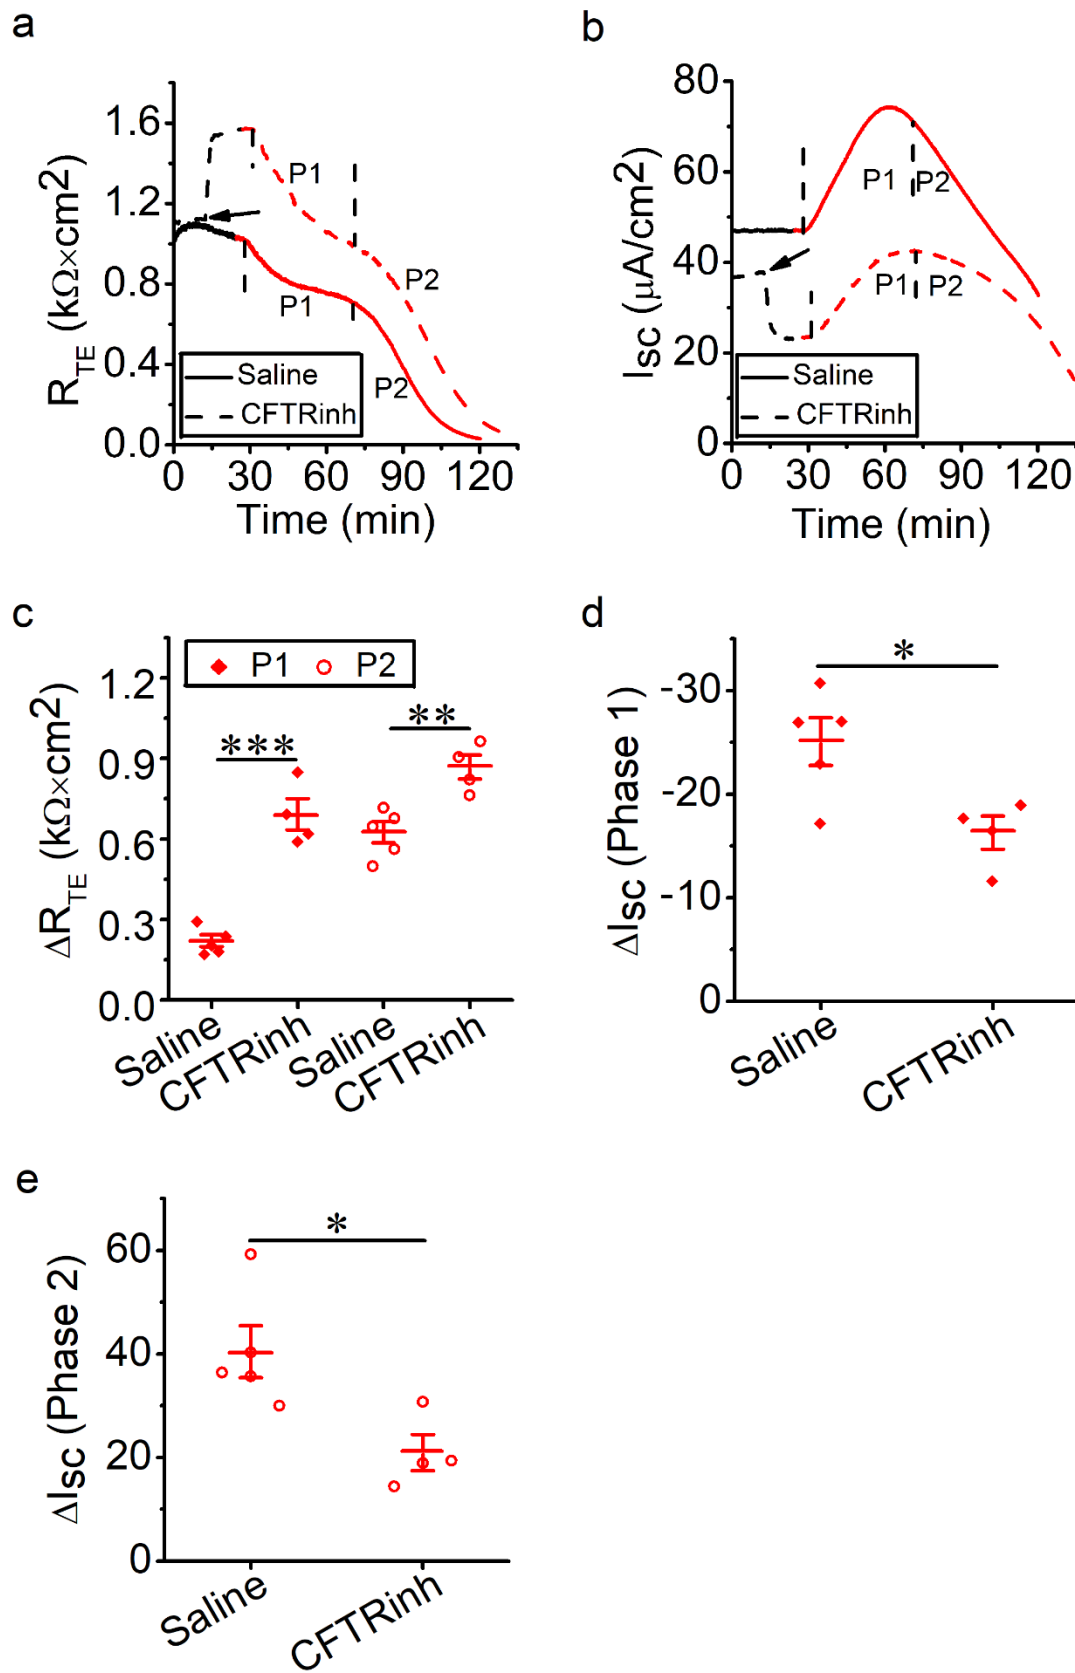

Fig. 4

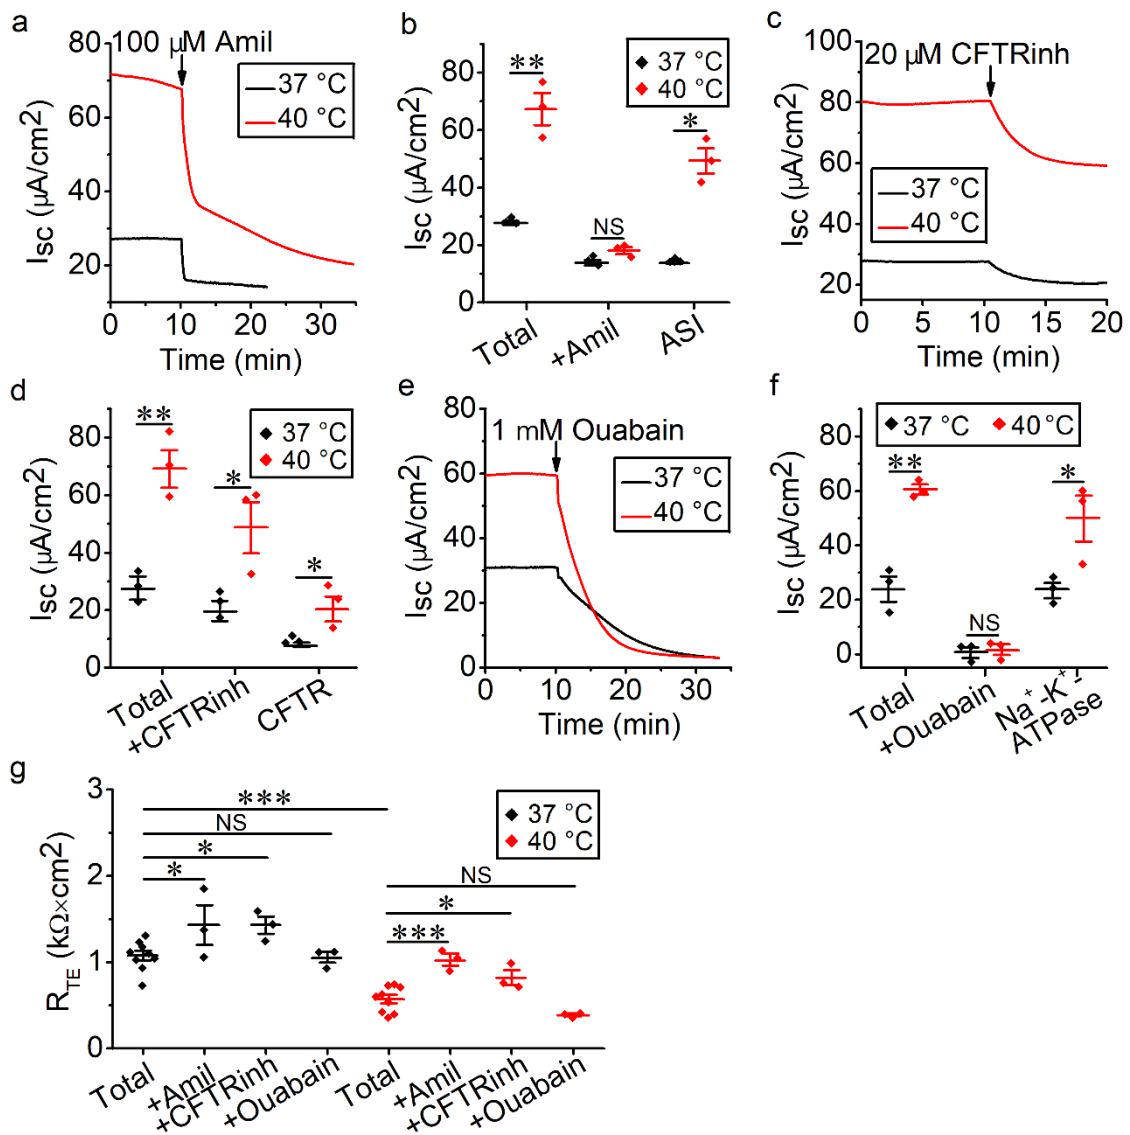

Fig. 5

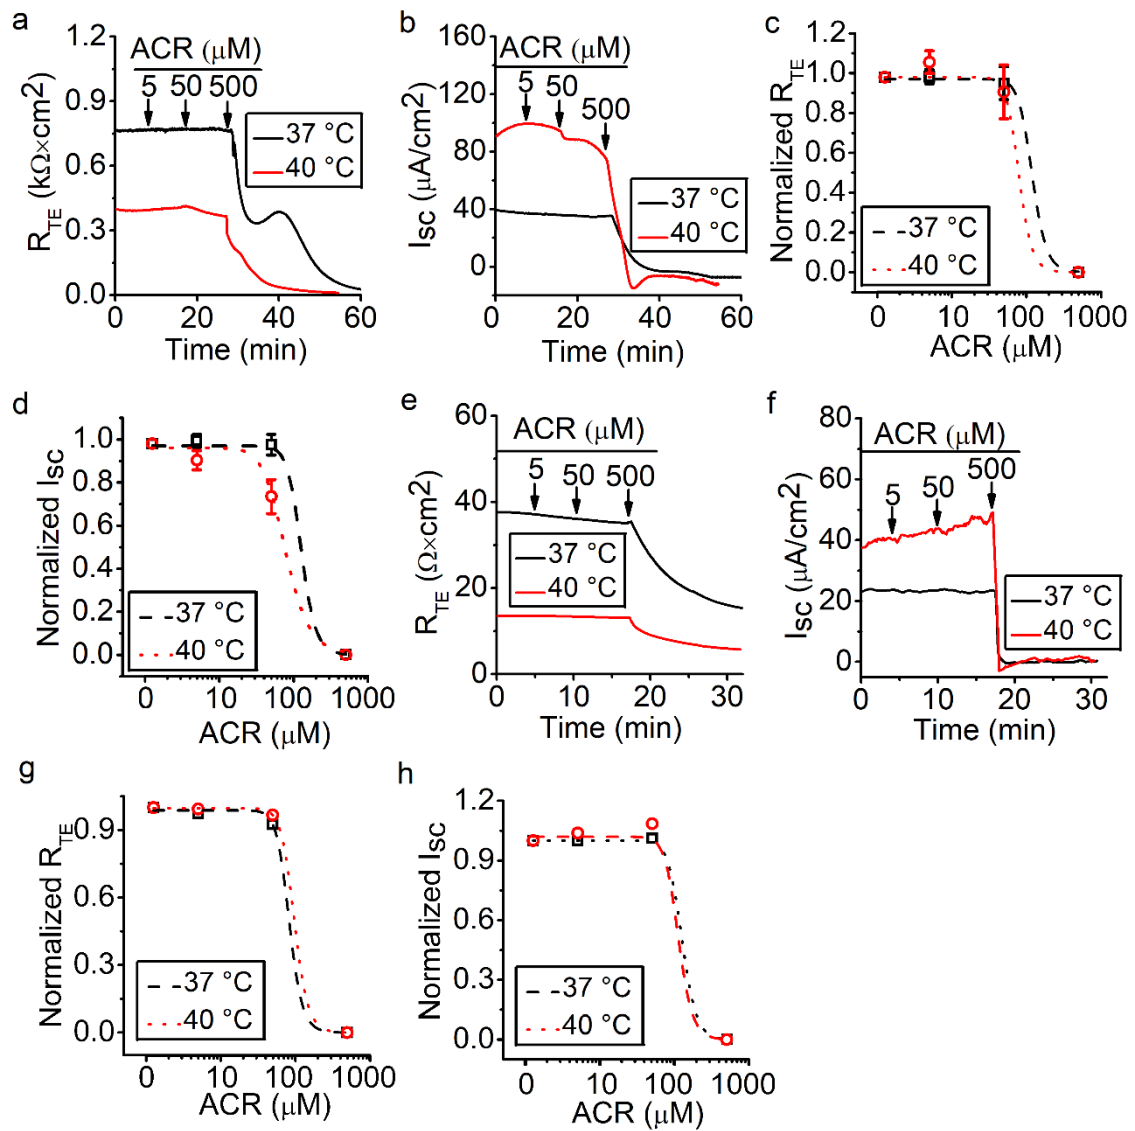



Fig. 6

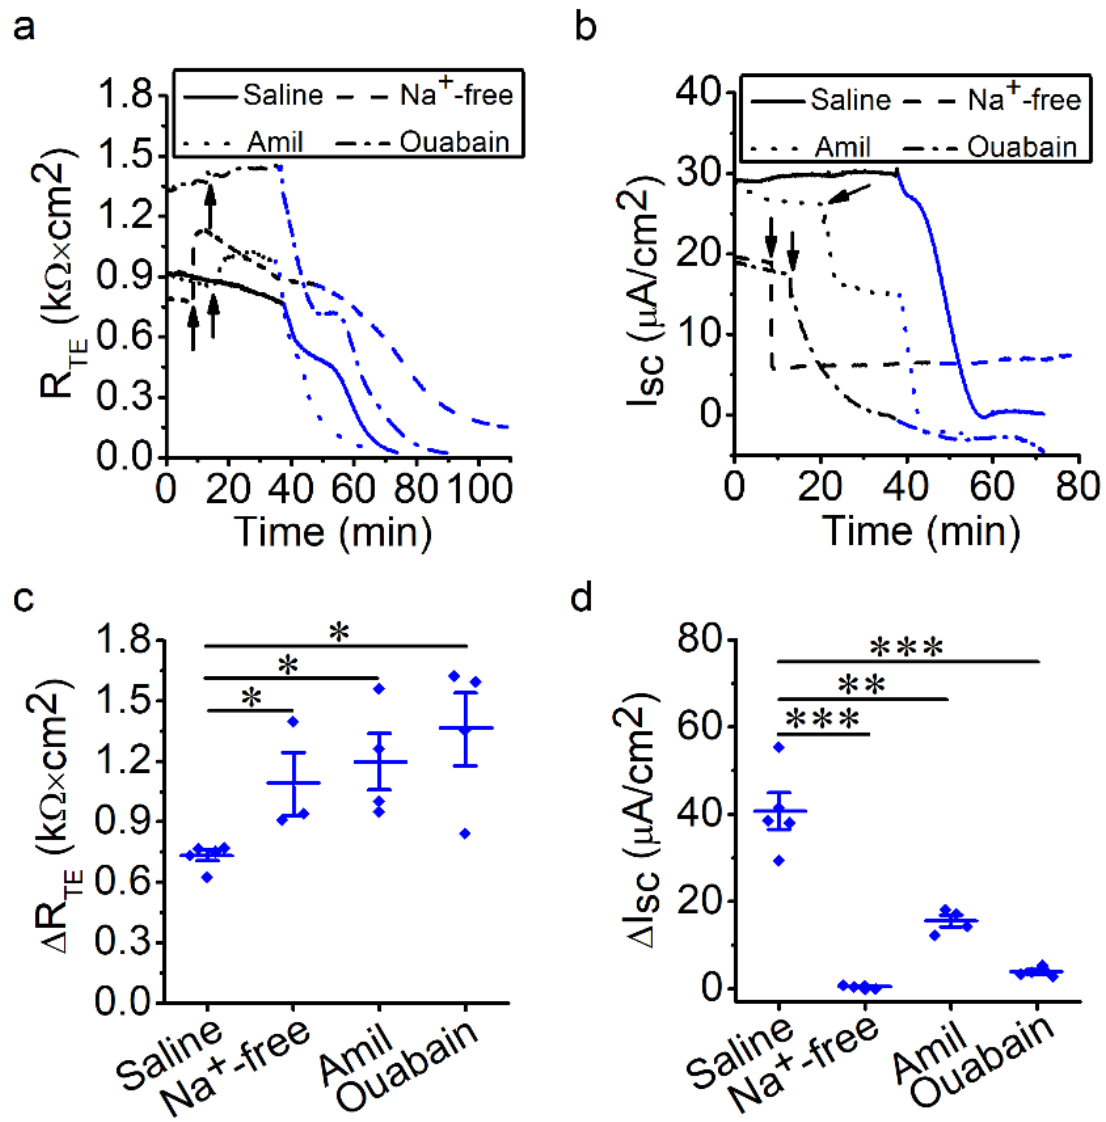

Fig. 7

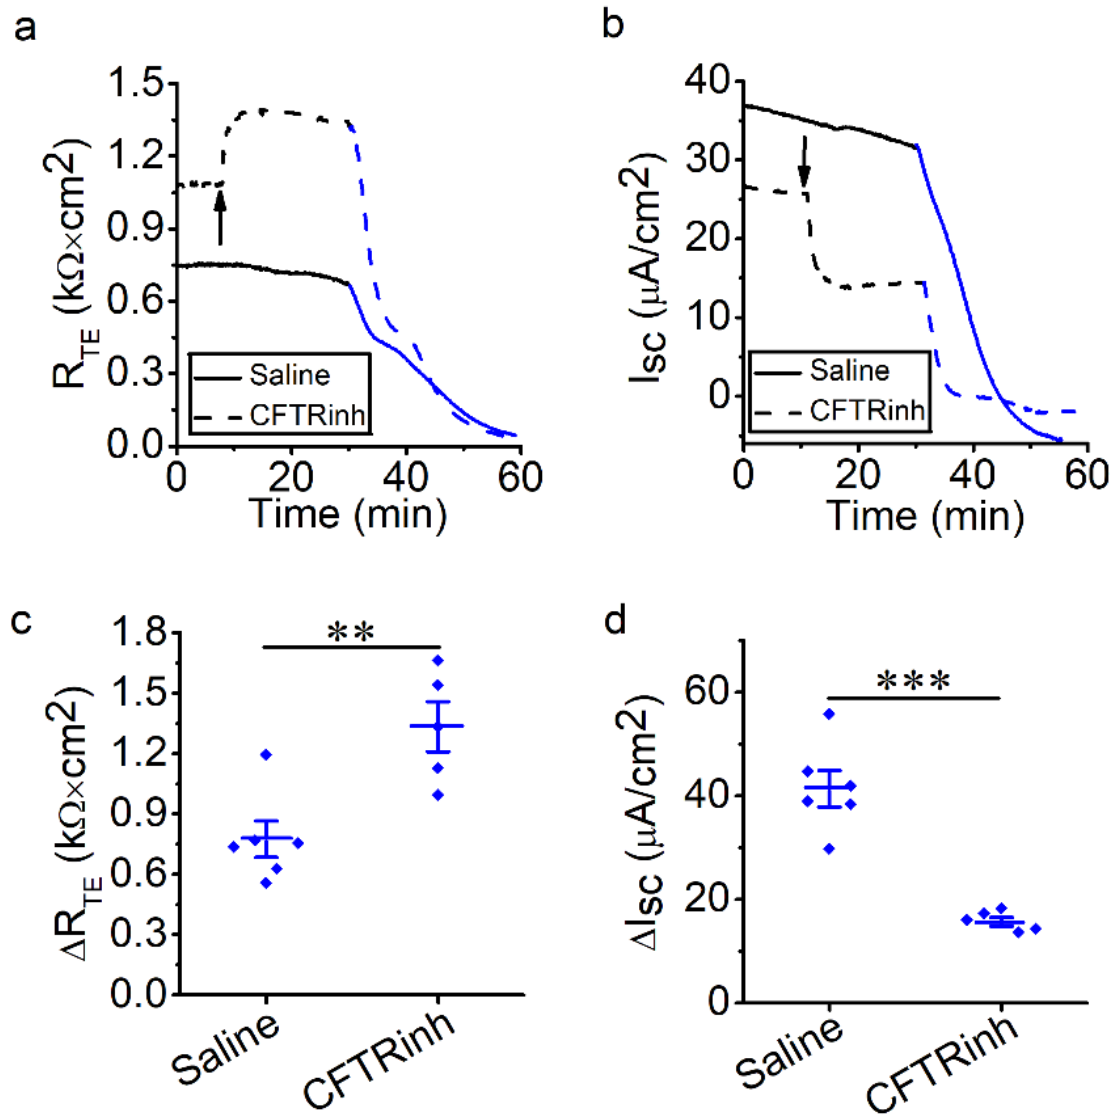

Fig. 8

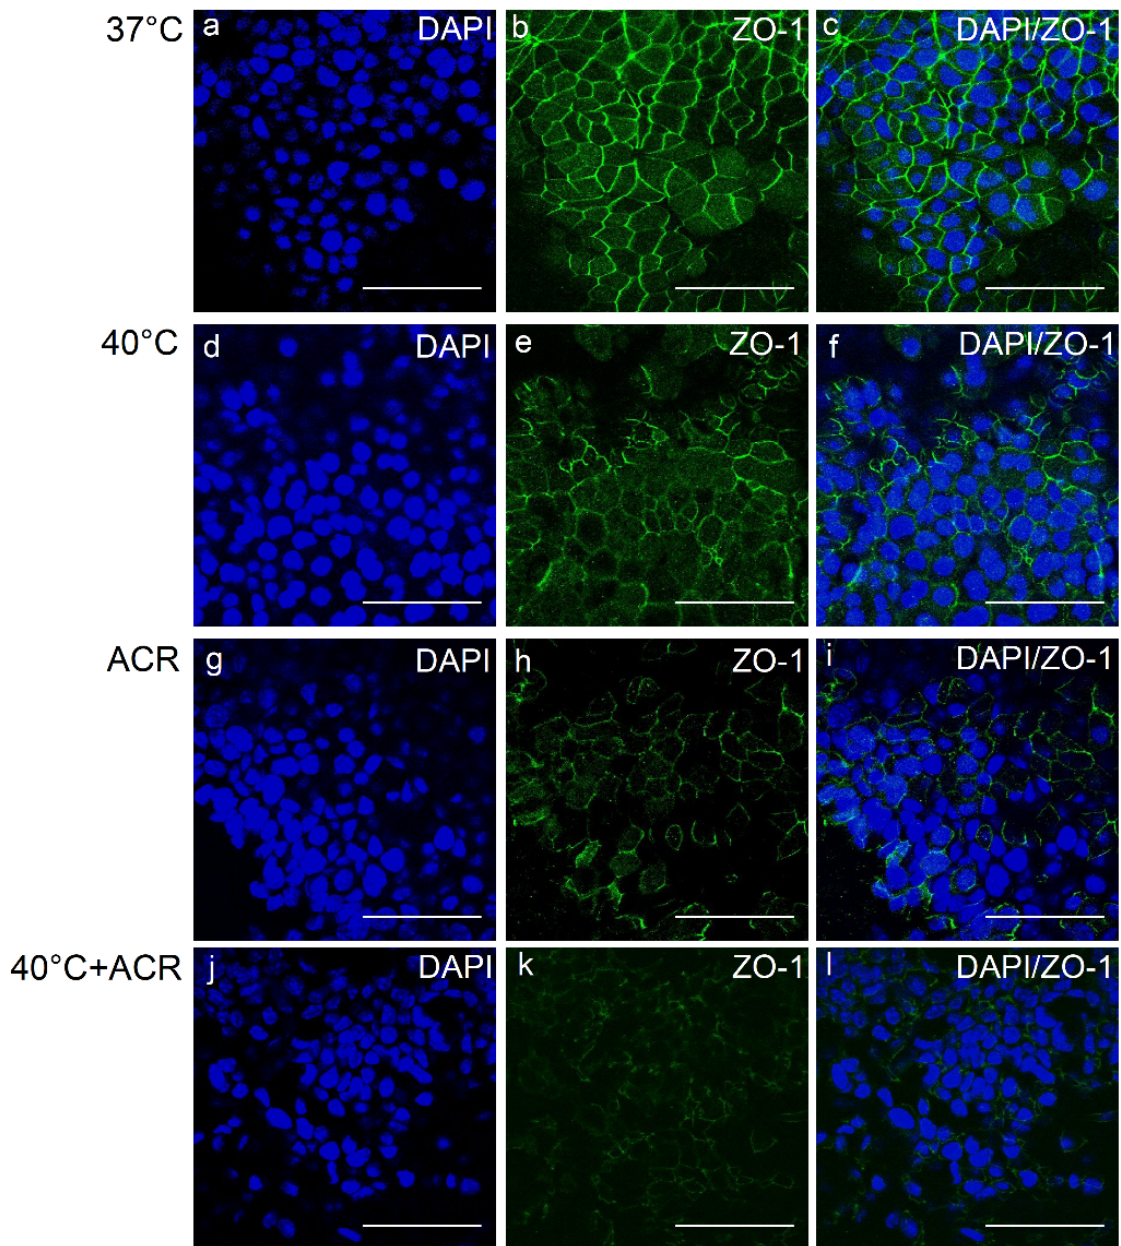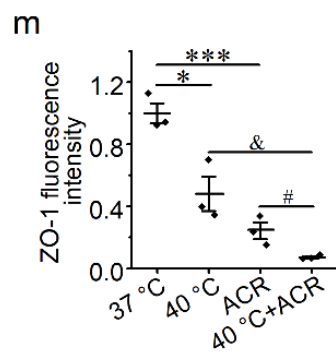

## Supplementary materials

### Ion transport mechanisms for smoke inhalation injured airway epithelial barrier

Jianjun Chang, Zaixing Chen<sup>&</sup>, Runzhen Zhao, Hong-Guang Nie, Hong-Long Ji

#### Supplemental Figure Legends Fig. S1 Extreme thermal stress disrupts bioelectric features in minutes in mouse tracheal

**epithelial (MTE) monolayers. (a)** Representative transepithelial resistance ( $R_{TE}$ ) trace at 37°C, 42°C, and 44°C.  $R_{TE}$  was eliminated to zero at 44°C. **(b)** Short-circuit current ( $I_{SC}$ ) trace recorded simultaneously of the same monolayer. At 44°C,  $I_{SC}$  was decreased followed by a jump, probably because of the damage to tight monolayer. **(c)** Representative  $R_{TE}$  trace at 37°C, 40°C, and 42°C.  $R_{TE}$  was eliminated to zero at 42°C. **(d)**  $I_{SC}$  trace of the same monolayer.  $I_{SC}$  was decreased at 42°C and then shot up and out of the scale in minutes probably due to impaired monolayer.

#### Fig. S2 Long process of apical and basolateral-permeabilizing destabilizes $R_{TE}$ and $I_{SC}$ measurements in MTE monolayers. (a)

Representative  $R_{TE}$  traces of apical-permeabilized MTE monolayers. After long time of apical permeabilizing process,  $R_{TE}$  was decreased near zero. **(b)**  $I_{SC}$  traces monitored synchronously of the same monolayers.  $I_{SC}$  was reduced followed by a jump. **(c)** Representative  $R_{TE}$  traces of basolateral-permeabilized MTE monolayers.  $R_{TE}$  was almost decreased to zero. **(d)**  $I_{SC}$  traces of the same monolayers.  $I_{SC}$  was decreased and then out of the scale upwardly probably due to the damage to tight monolayers.

#### Fig. S3 Cl<sup>-</sup>-free bath solution eliminates $R_{TE}$ and $I_{SC}$ levels in MTE monolayers. (a)

Representative  $R_{TE}$  trace in the presence of saline bath solution (control group, black line) and Cl<sup>-</sup>-free bath solution (green line). Cl<sup>-</sup>-free bath solution caused the transient increment followed by the slow decline of  $R_{TE}$ . **(b)**  $I_{SC}$  trace recorded synchronously of the same monolayer. **(c)** Average  $R_{TE}$  levels.  $R_{TE}$  was eliminated to  $0.24 \pm 0.03 \text{ k}\Omega \times \text{cm}^2$  compared with the control group ( $0.91 \pm 0.05 \text{ k}\Omega \times \text{cm}^2$ ), probably due to impaired tight monolayers. Student's t-test. \*\*\* $P < 0.001$ .  $n = 8$ . **(d)** Average  $I_{SC}$  levels. Student's t-test. \*\*\* $P < 0.001$ .  $n = 8$ .

**Fig. S4 Cell count and viability.** (a) Cell number of MTE monolayers post the exposure of thermal stress (120 min) and acrolein (500  $\mu$ M). Ten randomly selected images across the monolayers from at least 3 independent experiments were captured and counted for total cells with DAPI staining using a cell count plug-in of the ImageJ. No significant difference was observed among each group. Thermal stress and acrolein could not induce significant cell detachment of MTE monolayers. NS, no significance.  $n = 12$ . (b) Cell viability of MTE monolayers treated by thermal stress (120 min) and acrolein (500  $\mu$ M). At the end of treatment, cell viability was measured with the cell counting kit-8 assay. Thermal stress and acrolein failed to cause obvious cell death of MTE monolayers. NS, no significance.  $n = 12$ .

**Fig. S5 Comparison of the effects of acrolein on  $I_{SC}$  and  $R_{TE}$  in bubbled and unbubbled MTE monolayers.** (a) Representative  $R_{TE}$  trace when unbubbling (black line) or bubbling (red line). (b)  $I_{SC}$  trace recorded simultaneously of the same monolayers. Keeping bubbling the bath solution facilitated the loss of acrolein and mitigated the effects of acrolein on  $R_{TE}$  and  $I_{SC}$ .

**Fig. S6 Thermal stress and acrolein impair occludin tight junction of MTE monolayers.** Laser scanning confocal imaging for occludin tight junction of MTE monolayers treated by 37°C (a-c), 40°C for 120 min (d-f), 500  $\mu$ M acrolein (g-i), and the combination of 40°C and 500  $\mu$ M acrolein (j-l). Nuclei were labeled with hoechst (blue), and tight junctions were labeled with occludin (green). Scale bar: 10  $\mu$ m. (m-o) Immunolocalization of claudin tight junction of normal MTE monolayer. Nuclei were labeled with hoechst (blue), and tight junctions were labeled with claudin (green). The expression of claudin was insufficient to be visualized. Scale bar: 50  $\mu$ m. (p) Fluorescein isothiocyanate-dextran (4 kDa) permeability assay of MTE monolayers. MTE monolayers were treated by 37°C, 40°C for 120 min, 500  $\mu$ M acrolein, and the combination of 40°C and 500  $\mu$ M acrolein. Thermal stress and acrolein increased the permeability of fluorescein isothiocyanate-dextran. Student's t-test. \*\*\* $P < 0.001$ .  $n = 14$ .

Fig. S1

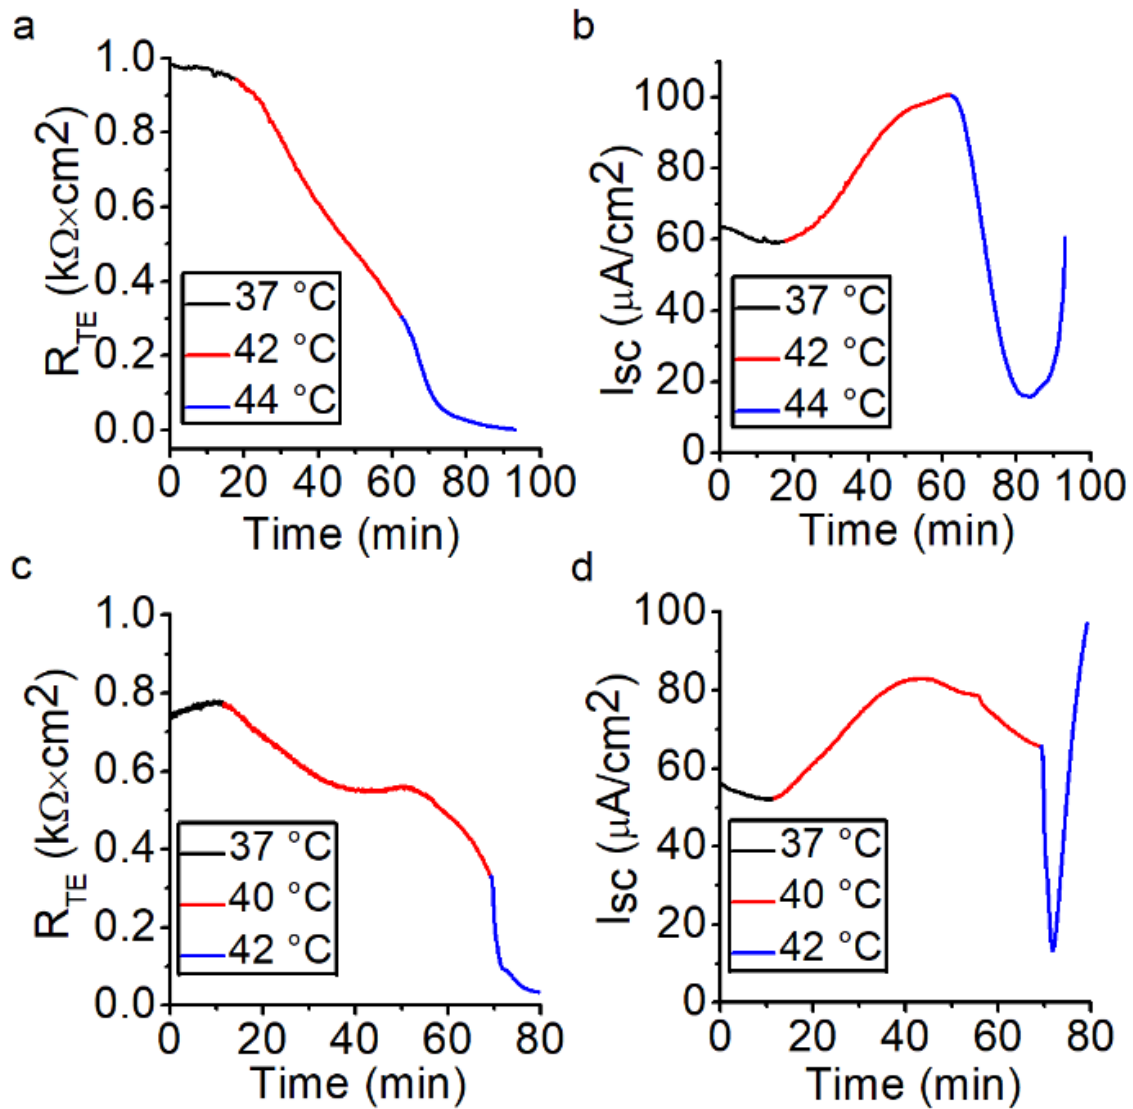

Fig. S2

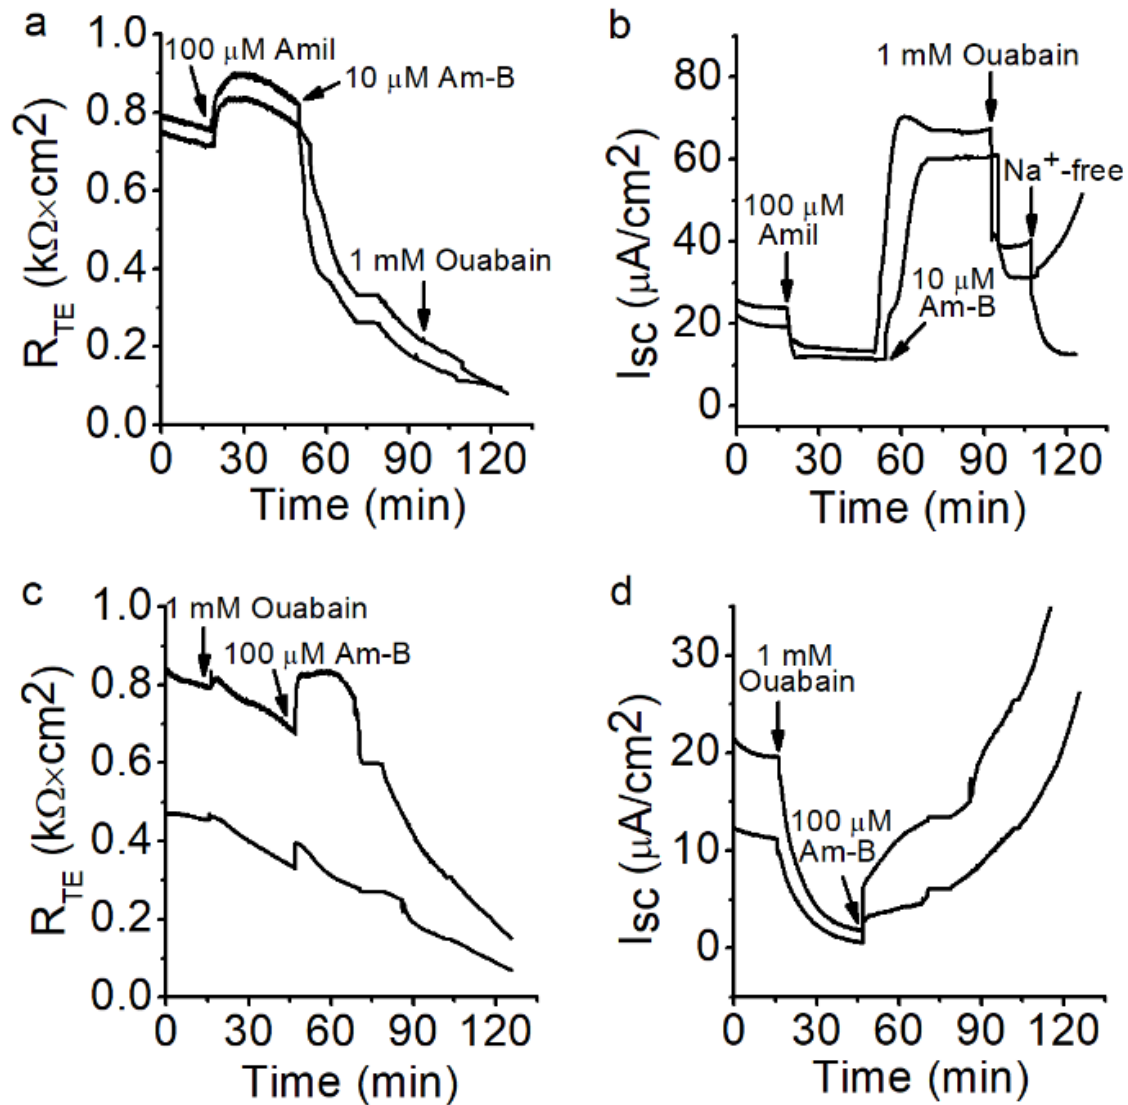

Fig. S3

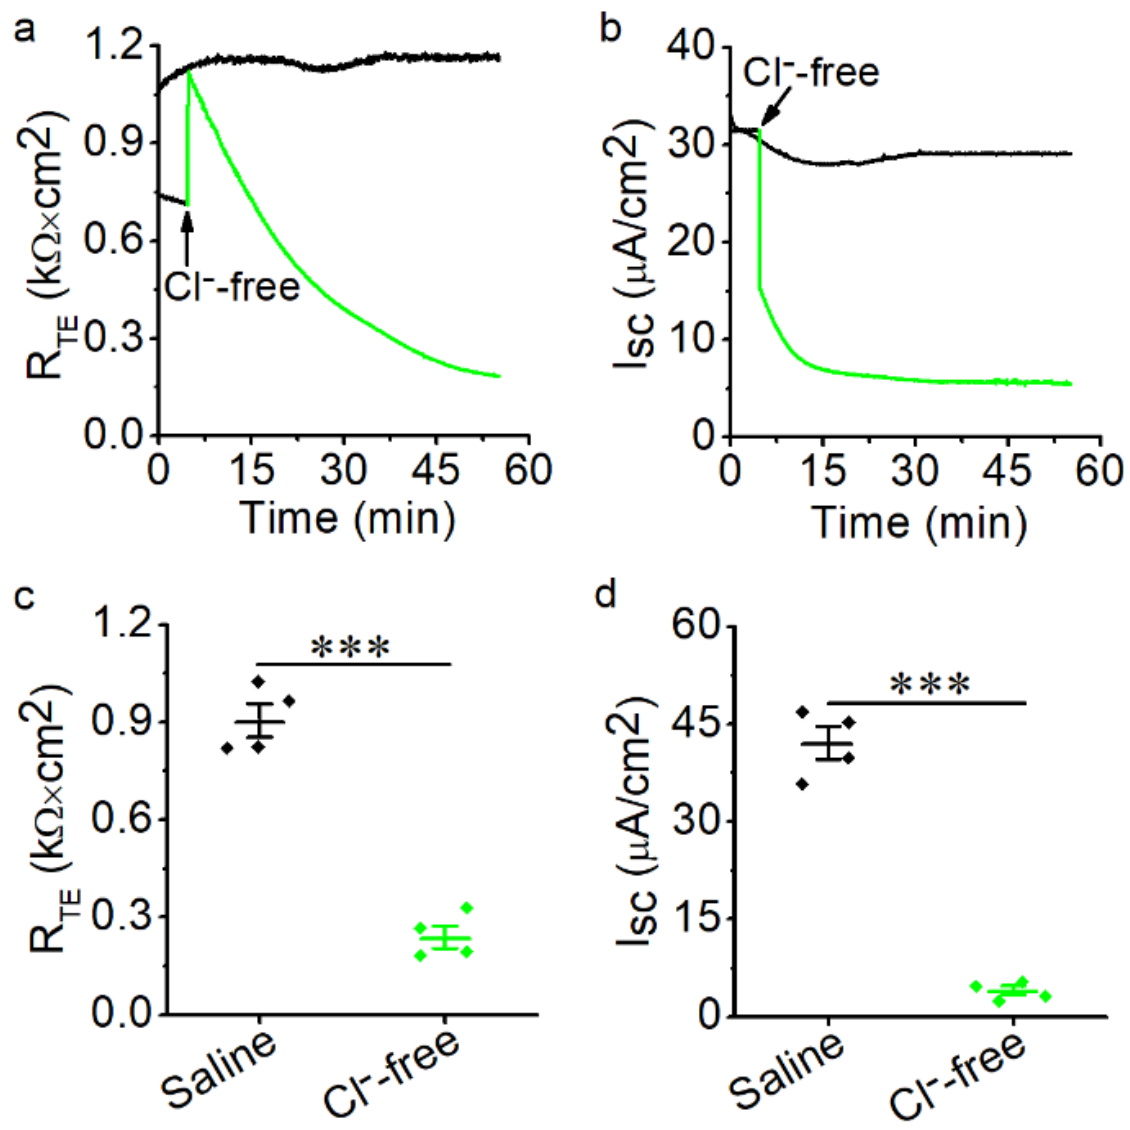



Fig. S4

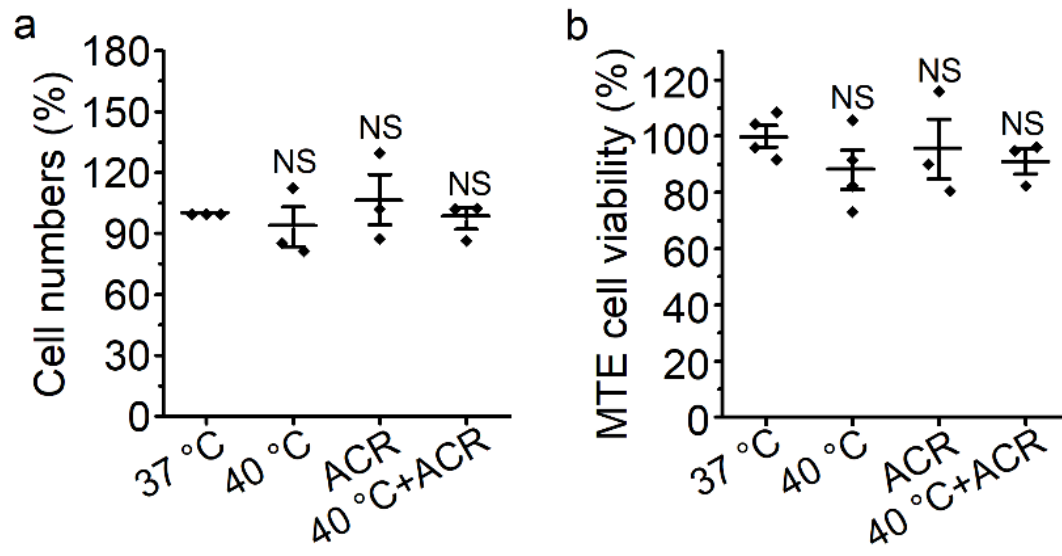

Fig S5

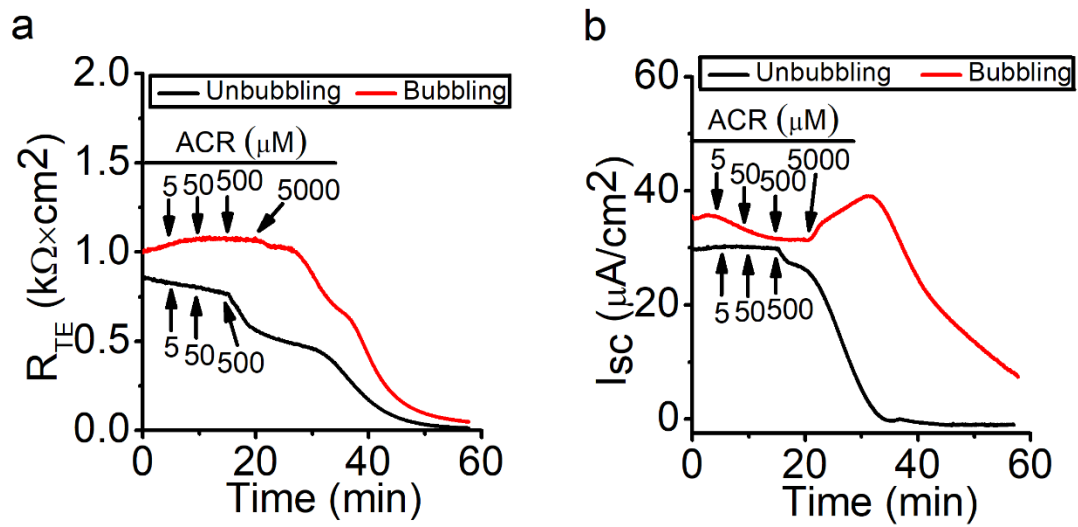

Fig. S6

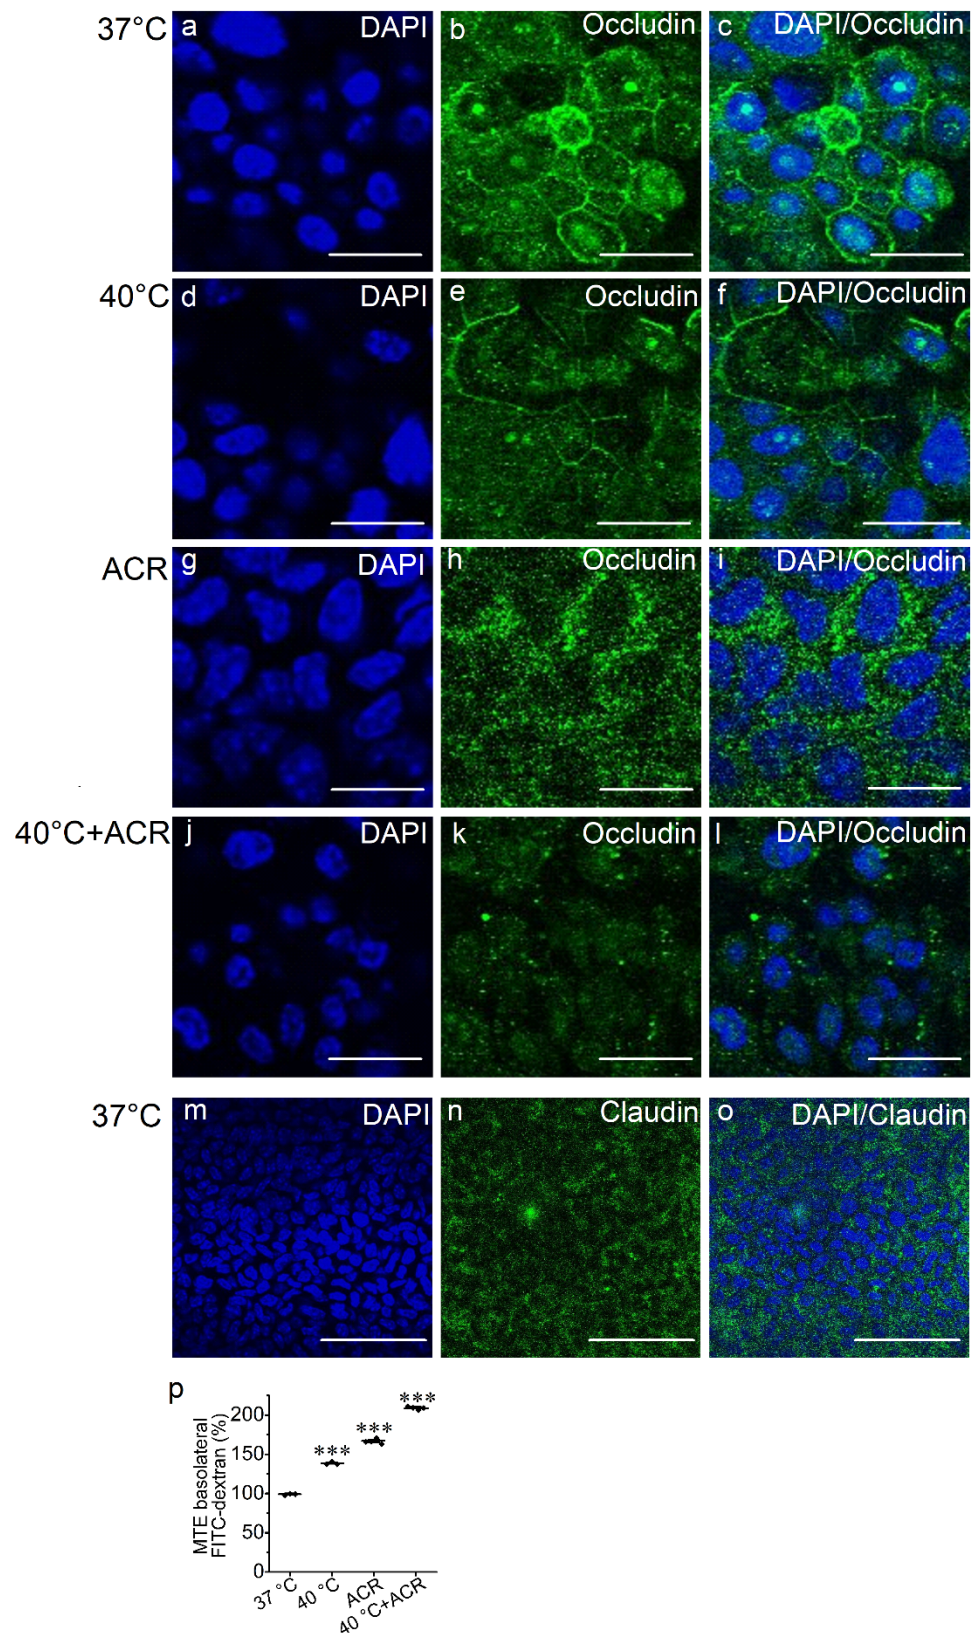

Source: https://www.biorxiv.org/content/10.1101/2020.03.25.007807v1.full.pdf
